# Supplementary material for: Simulation of the Interactions of Arginine with Wild-Type GALT Enzyme and the Classic Galactosemia-Related Mutant p.Q188R by a Computational Approach
Source: Molecules. 2021 Oct 7;26(19):6061. doi: 10.3390/molecules26196061 (PMC8513022; doi:10.3390/molecules26196061)
Supplement: Supplementary file 1 [file molecules-26-06061-s001.zip › supplFigures-siArg_sito+cavita-rev.pdf]

**Figure S1**  
**Docking results**  
**Simulations with arginine in the active site**  
**Position of the selected pose**

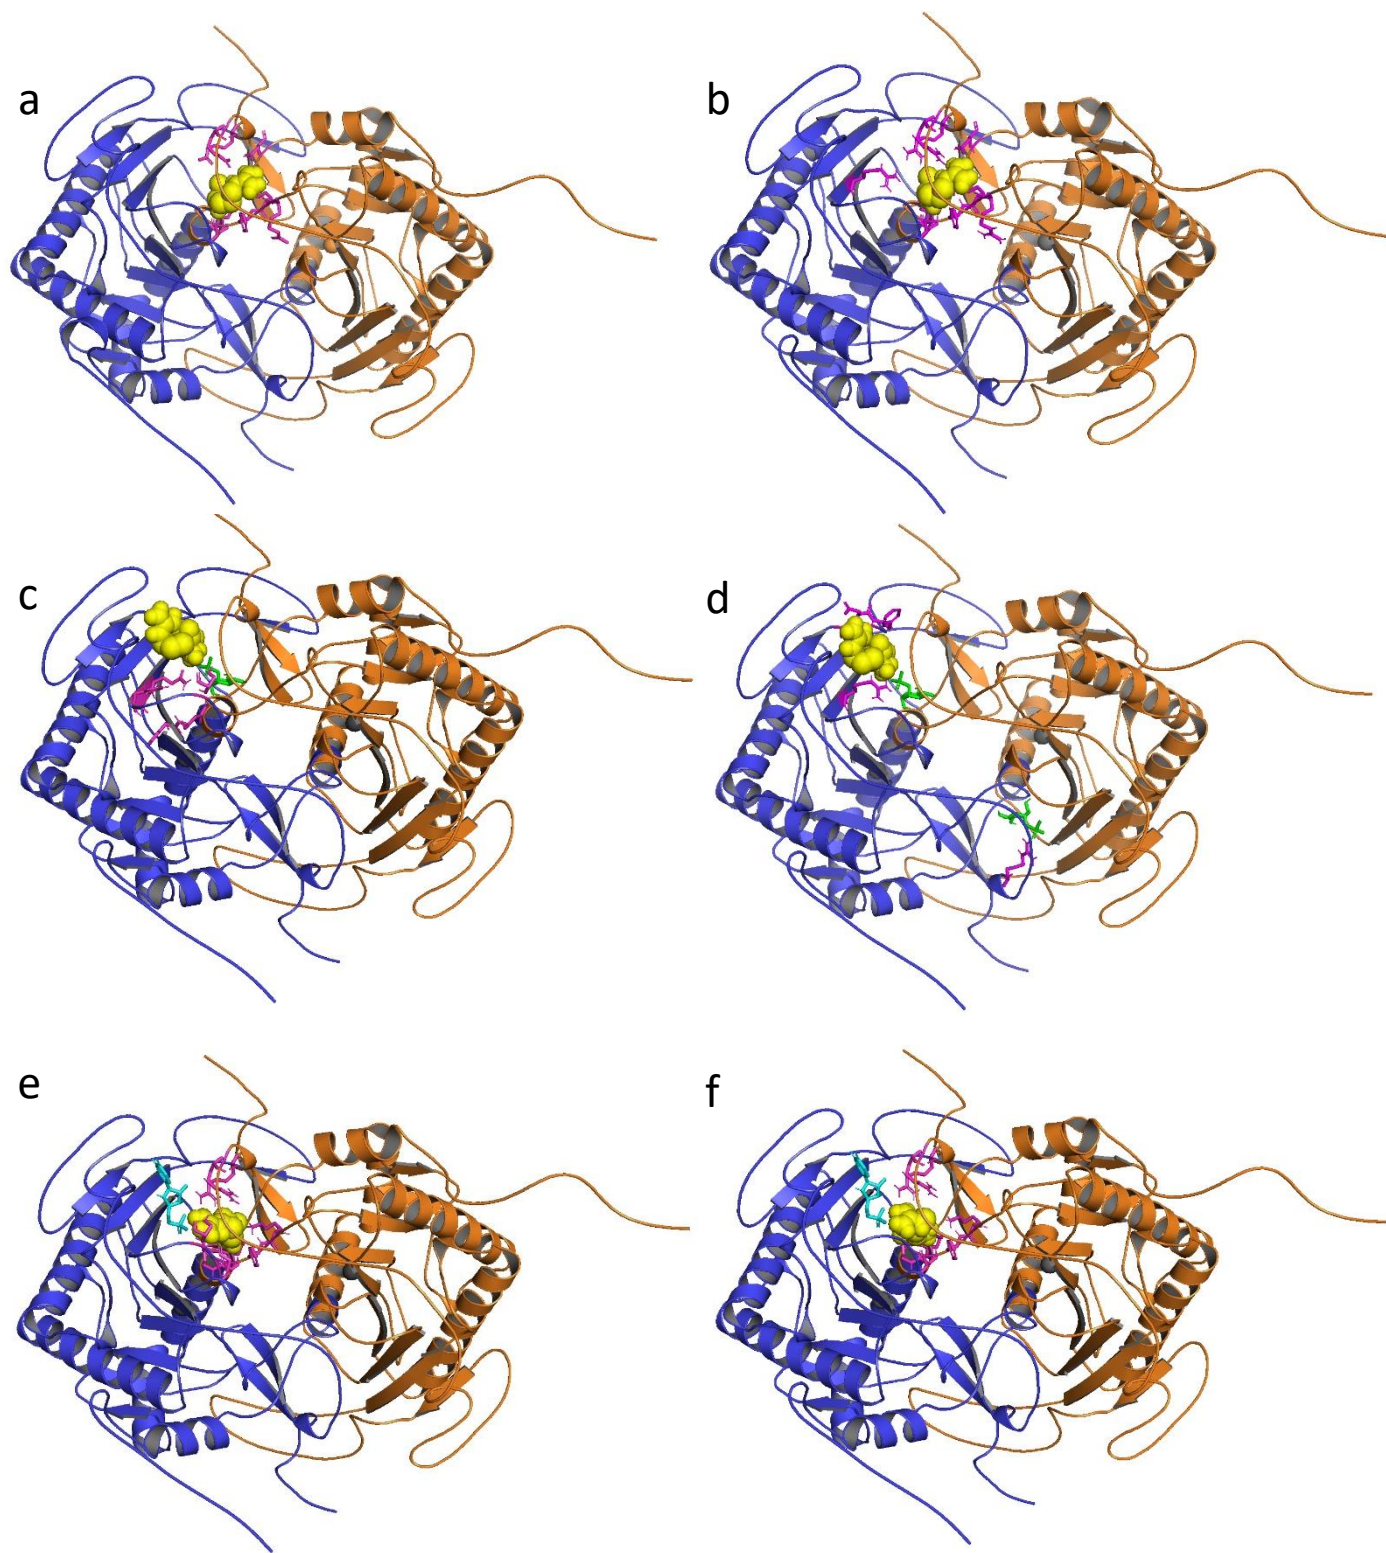

a): wtGALT+arginine; b): p.Gln188Arg+arginine; c) wtGALT+G1P+arginine; d) p.Gln188Arg+G1P+arginine; e) wtGALT+H2U+arginine; f) p.Gln188Arg+H2U+arginine. Arginine is represented in yellow spheres. Color codes as for Figure 1

# Figure S2

## Docking results

### Simulations with arginine in the active site - interactions

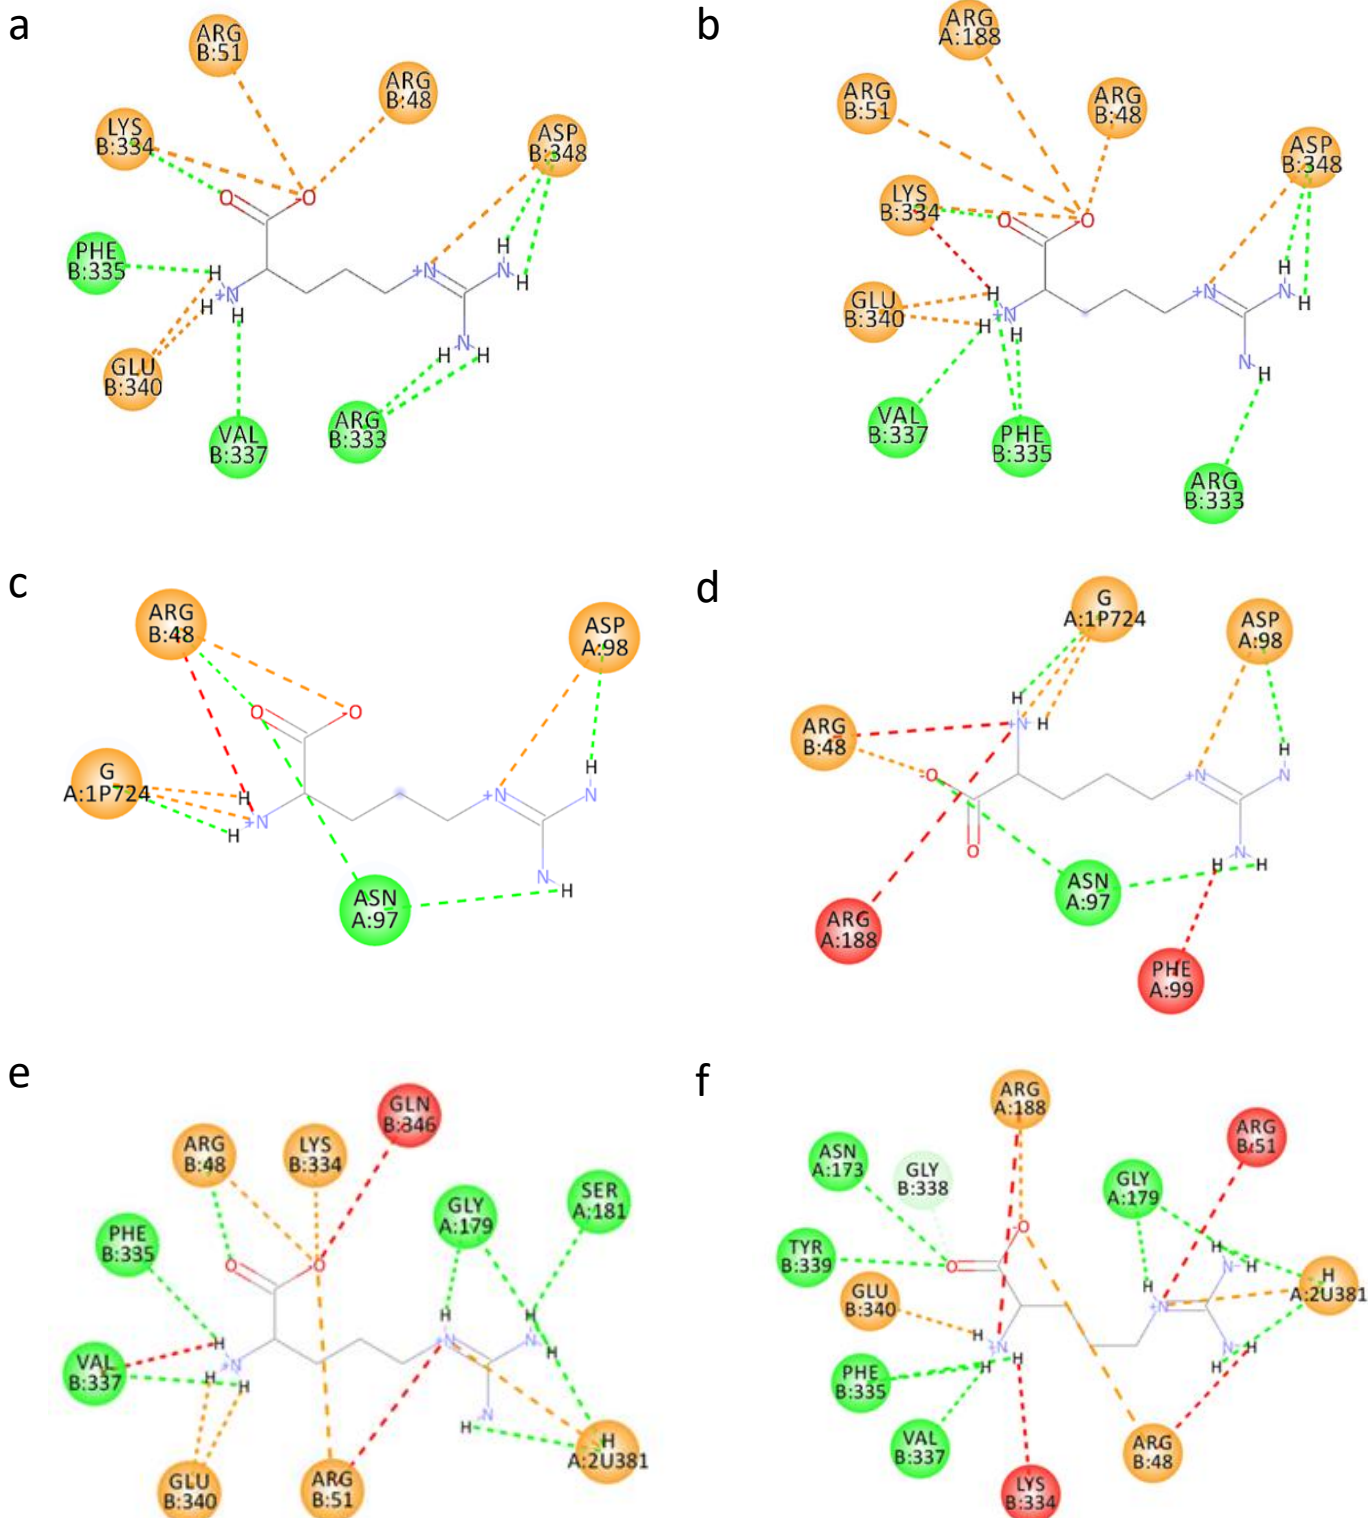

a): wtGALT+arginine; b): p.Gln188Arg+arginine; c) wtGALT+G1P+arginine; d) p.Gln188Arg+G1P+arginine; e) wtGALT+H2U+arginine; f) p.Gln188Arg+H2U+arginine. Color codes: orange: attractive charge; green: hydrogen bonds; grey: other favorable bonds; red: unfavorable bonds.

**Figure S3**  
**Docking results**  
**Simulations with arginine in the central cavity**  
**Position of the selected pose**

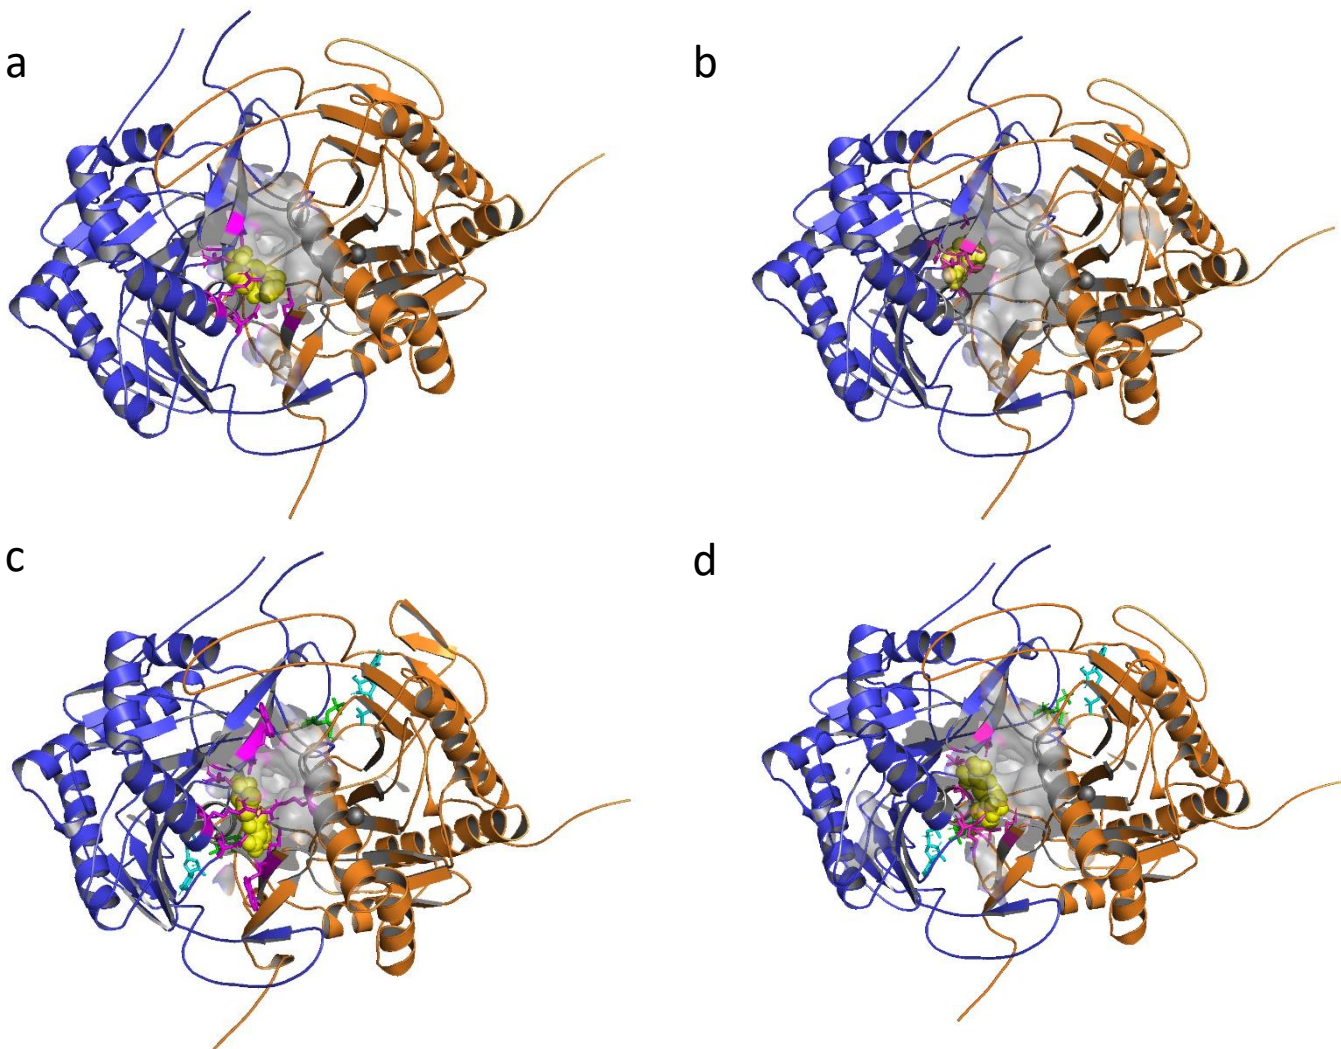

a): wtGALT+arginine; b): p.Gln188Arg+arginine; c) wtGALT+G1P+H2U+arginine; d) p.Gln188Arg+G1P+H2U+arginine. Arginine is represented in yellow spheres. Color codes as for Figure 1

# Figure S4

## Docking results

### Simulations with arginine in the central cavity - interactions

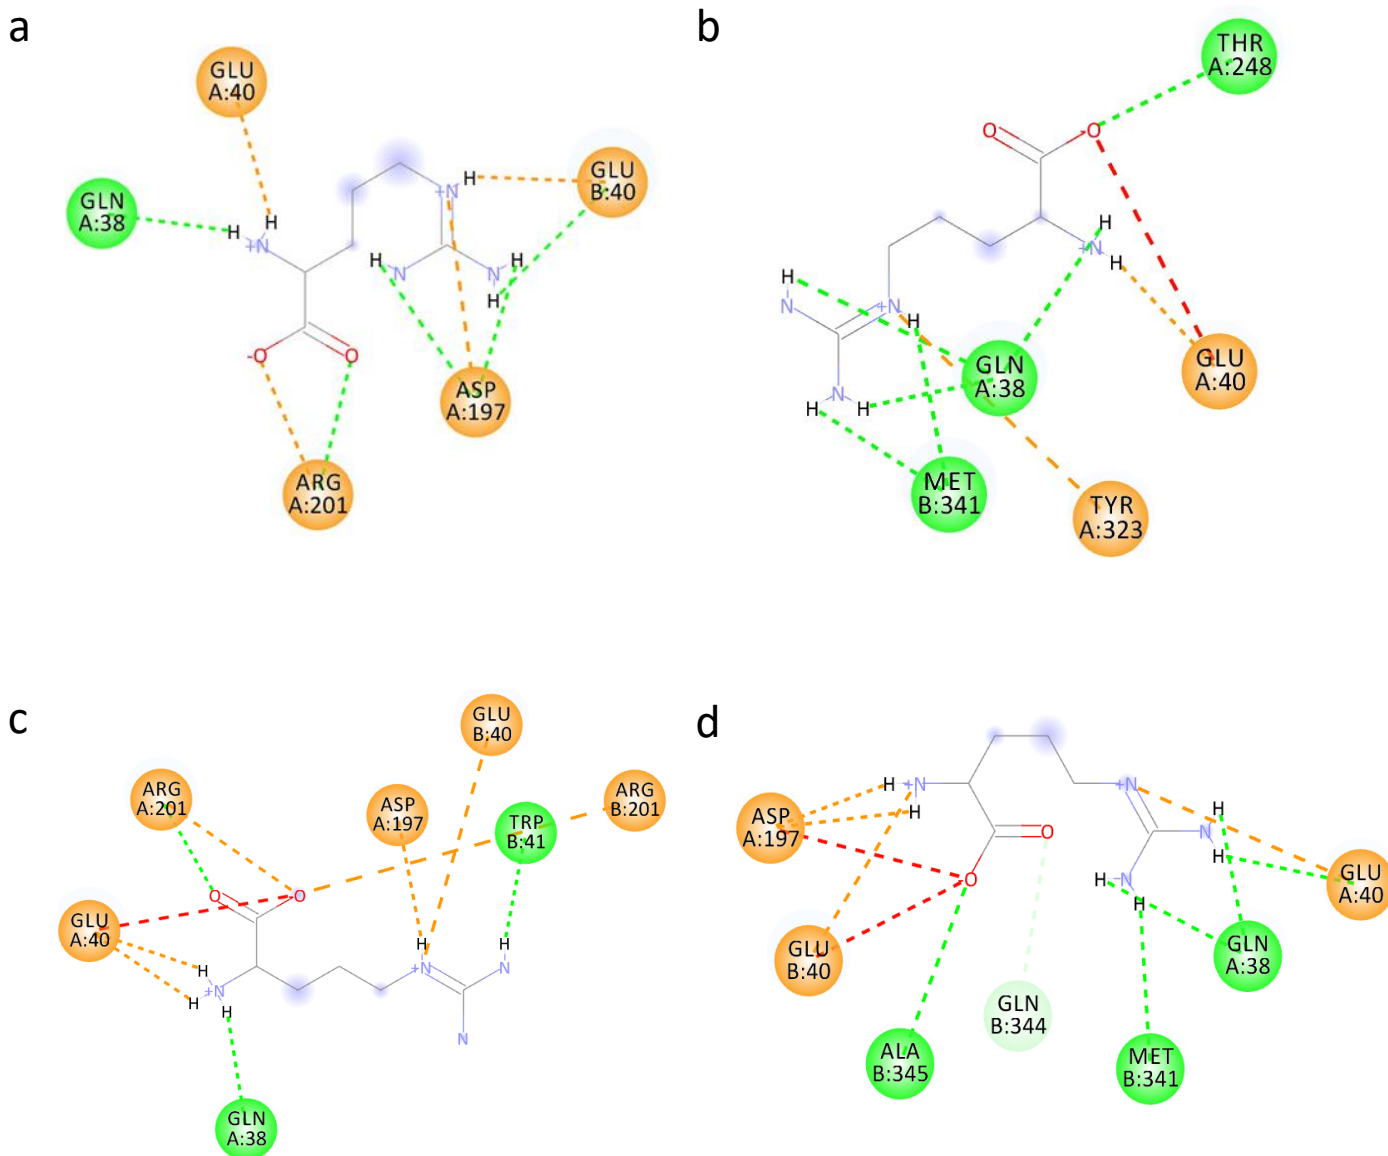

a): wtGALT+arginine; b): p.Gln188Arg+arginine; c) wtGALT+G1P+H2U+arginine; d) p.Gln188Arg+G1P+H2U+arginine. Color codes: orange: attractive charge; green: hydrogen bonds; grey: other favorable bonds; red: unfavorable bonds.

**Figure S5**  
**Pair distance between enzyme and arginine,**  
**simulations with arginine in the active site**

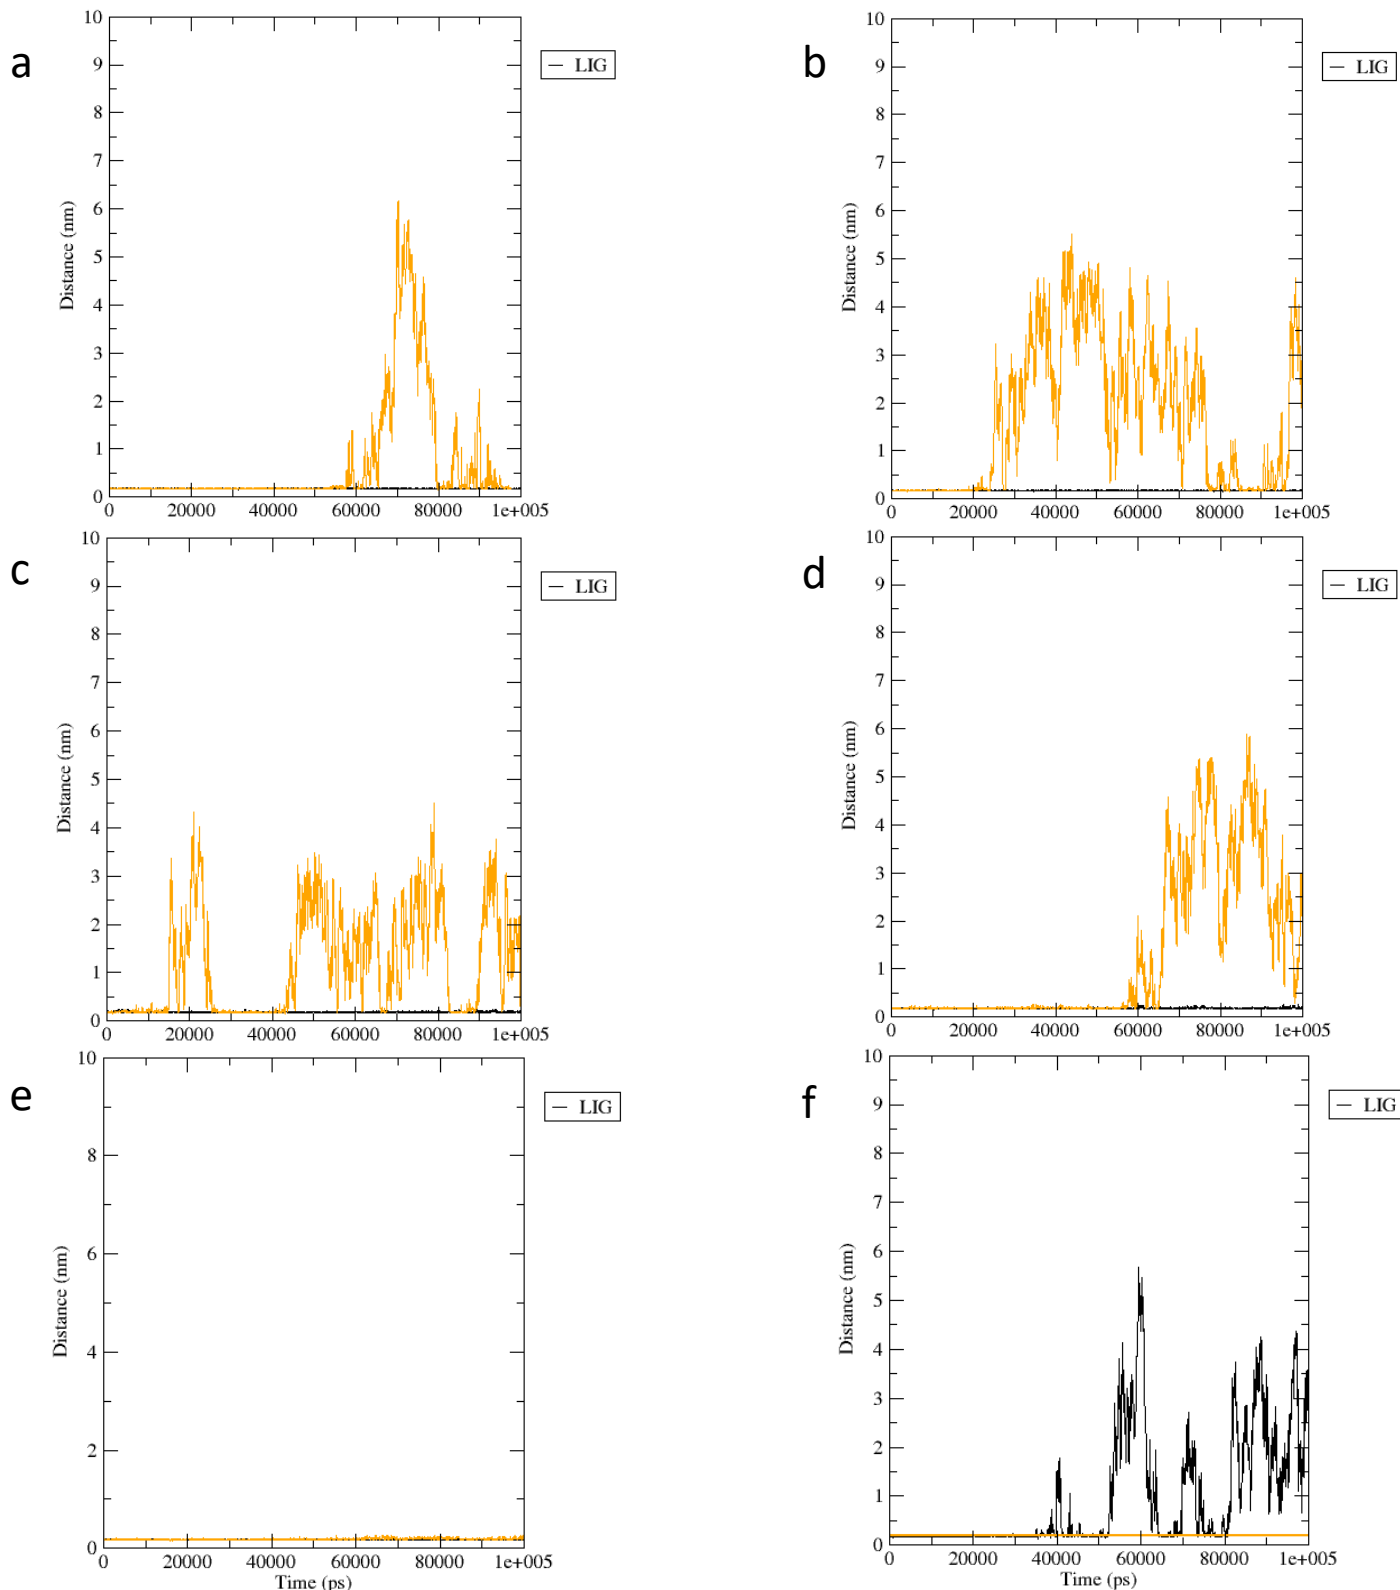

a): wtGALT+arginine; b): p.Gln188Arg+arginine; c) wtGALT+G1P+arginine; d) p.Gln188Arg+G1P+arginine; e) wtGALT+H2U+arginine; f) p.Gln188Arg+H2U+arginine. Black line: first simulation; orange line: second simulation.

**Figure S6**  
**Pair distance between enzyme and substrates,**  
**simulations with arginine in the active site**

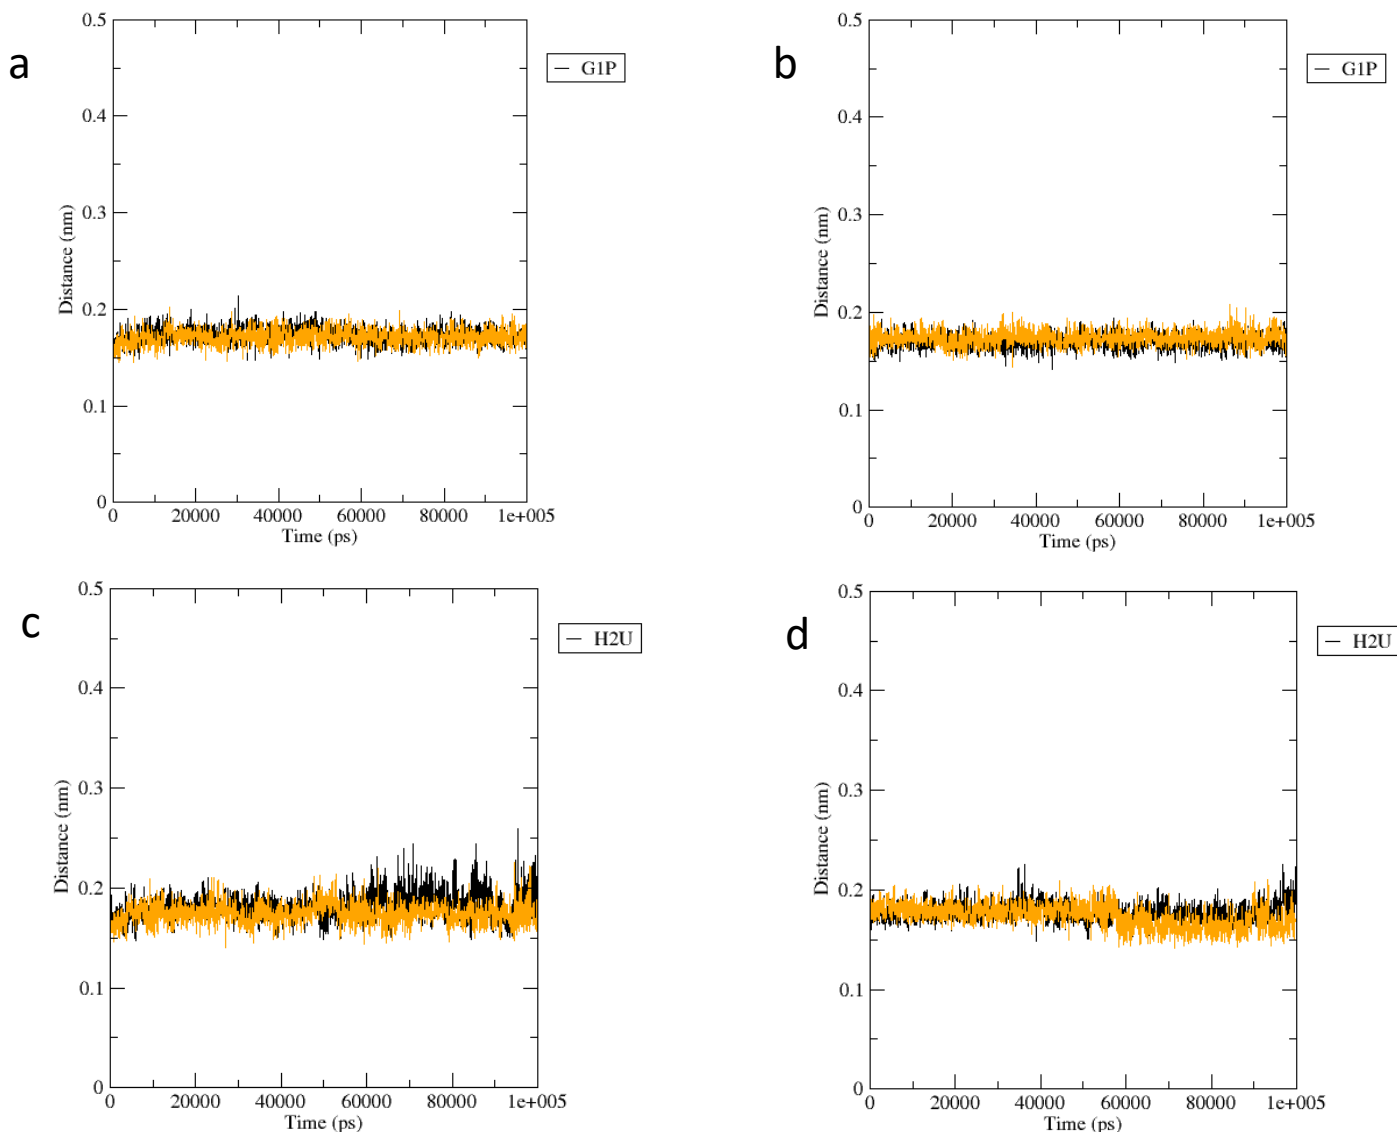

a): pair distance of G1P in the simulation wtGALT+G1P+arginine; b) pair distance of G1P in the simulation p.Gln188Arg+G1P+arginine; c): pair distance of H2U in the simulation wtGALT+H2U+arginine; b) pair distance of H2U in the simulation p.Gln188Arg+H2U+arginine. Black line: first simulation; orange line: second simulation.

**Figure S7**  
**Radius of gyration**  
**simulations with arginine in the active site**

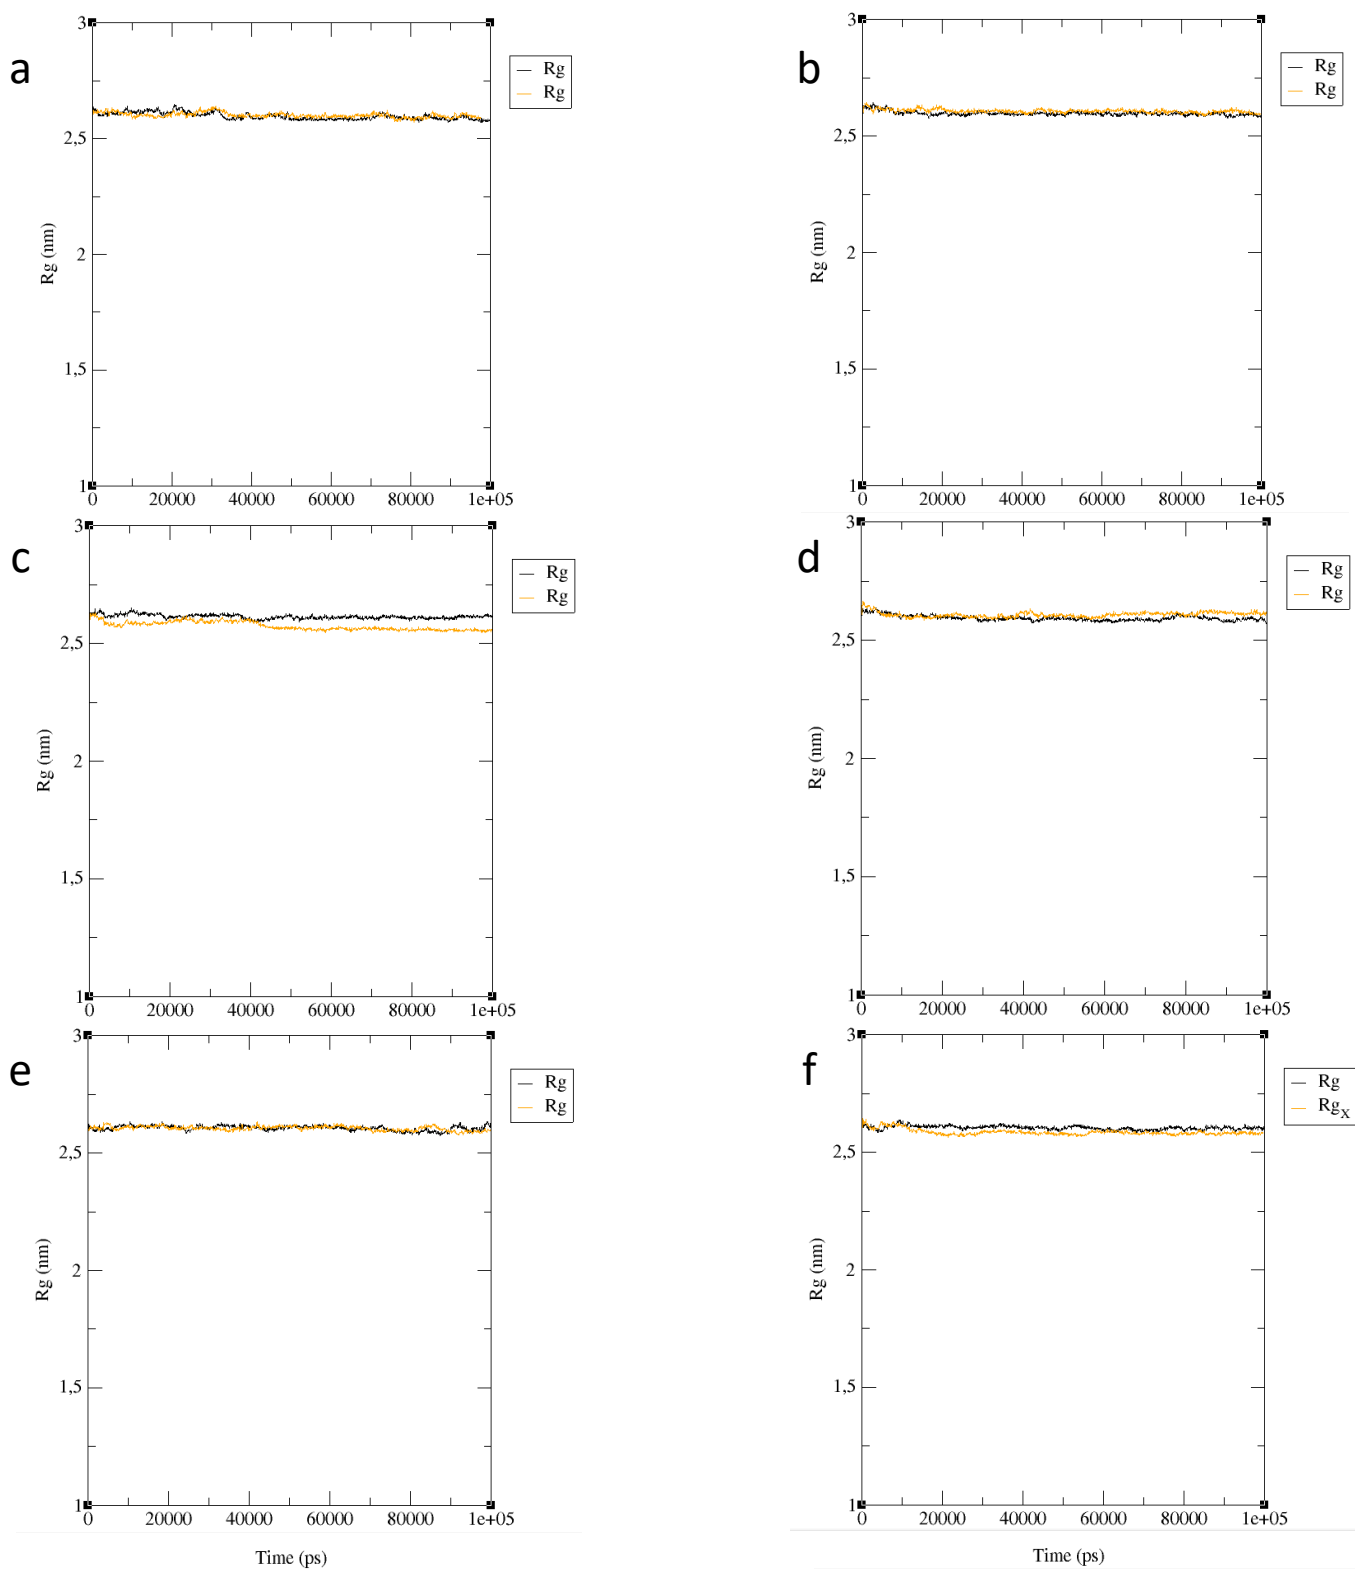

a): wtGALT+arginine; b): p.Gln188Arg+arginine; c) wtGALT+G1P+arginine; d) p.Gln188Arg+G1P+arginine; e) wtGALT+H2U+arginine; f) p.Gln188Arg+H2U+arginine. Black line: first simulation; orange line: second simulation.

# Figure S8

## SASA

### simulations with arginine in the active site

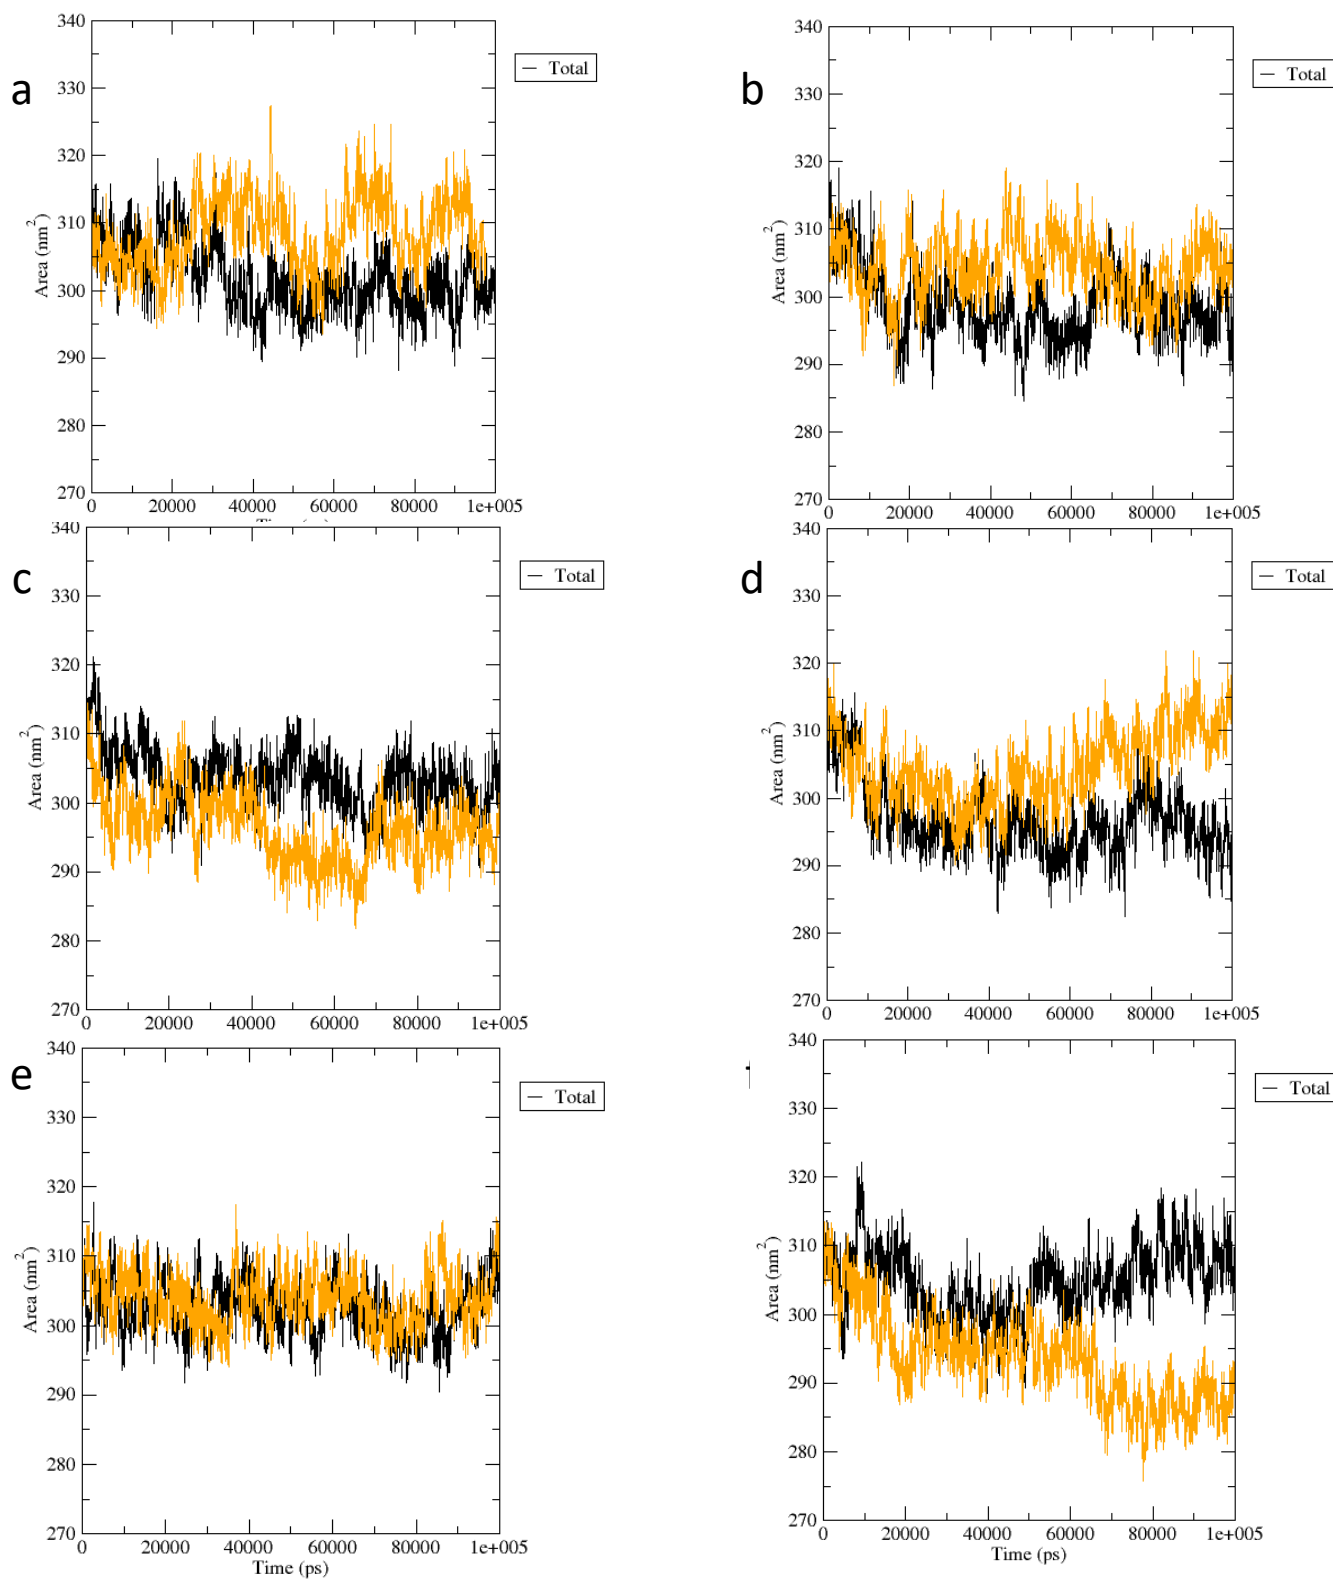

a): wtGALT+arginine; b): p.Gln188Arg+arginine; c) wtGALT+G1P+arginine; d) p.Gln188Arg+G1P+arginine; e) wtGALT+H2U+arginine; f) p.Gln188Arg+H2U+arginine. Black line: first simulation; orange line: second simulation.

**Figure S9**  
**Pair distance between enzyme and arginine**  
**simulations with arginine in the central cavity**

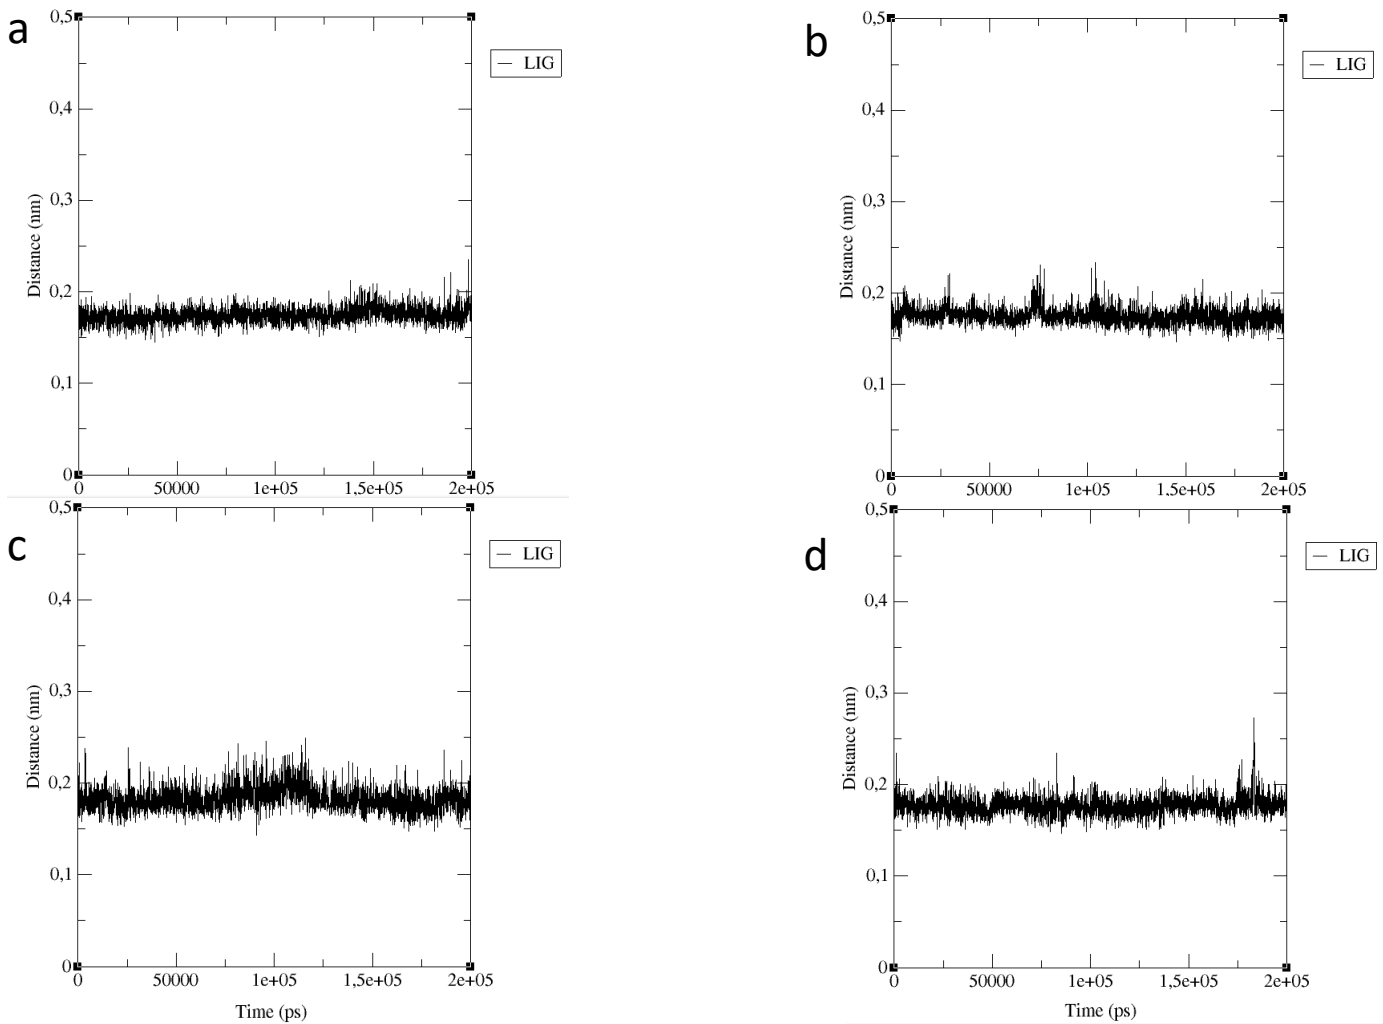

a): wtGALT+arginine; b): p.Gln188Arg+arginine; c) wtGALT+G1P+H2U+arginine; d) p.Gln188Arg+G1P+H2U+arginine.

**Figure S10**  
**Pair distance between enzyme and substrates,**  
**simulations with arginine in the central cavity**

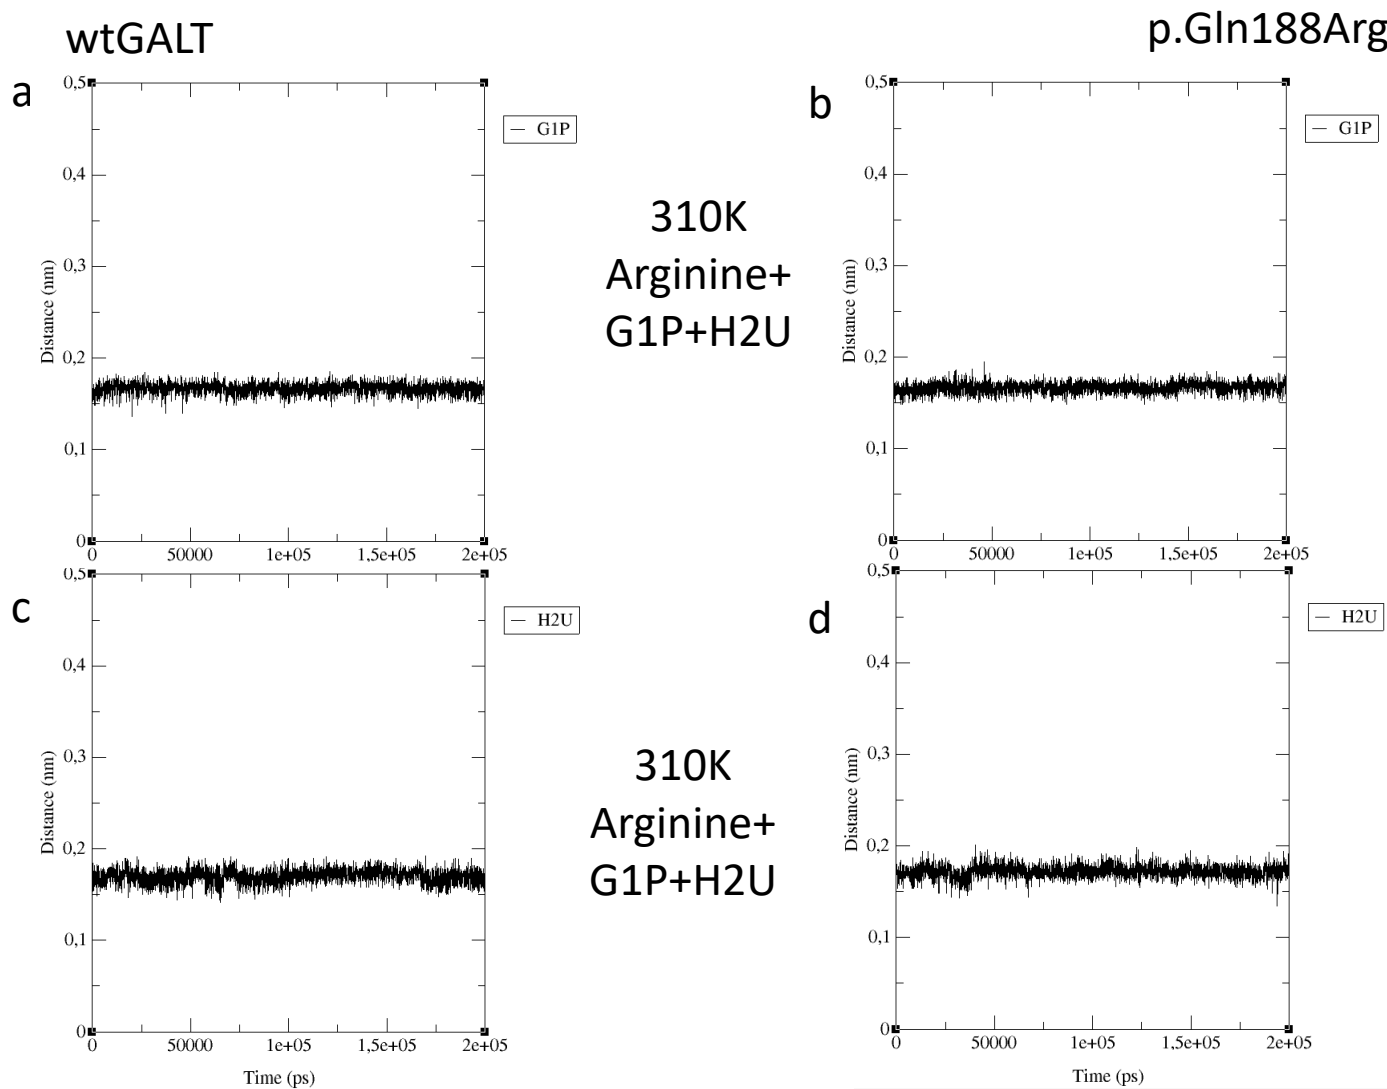

a): pair distance of G1P in the simulation wtGALT+G1P+H2U+arginine; b) pair distance of G1P in the simulation p.Gln188Arg+G1P+H2U+arginine; c): pair distance of H2U in the simulation wtGALT+G1P+H2U+arginine; b) pair distance of H2U in the simulation p.Gln188Arg+G1P+H2U+arginine

**Figure S11**  
**Radius of gyration**  
**simulations with arginine in central cavity**

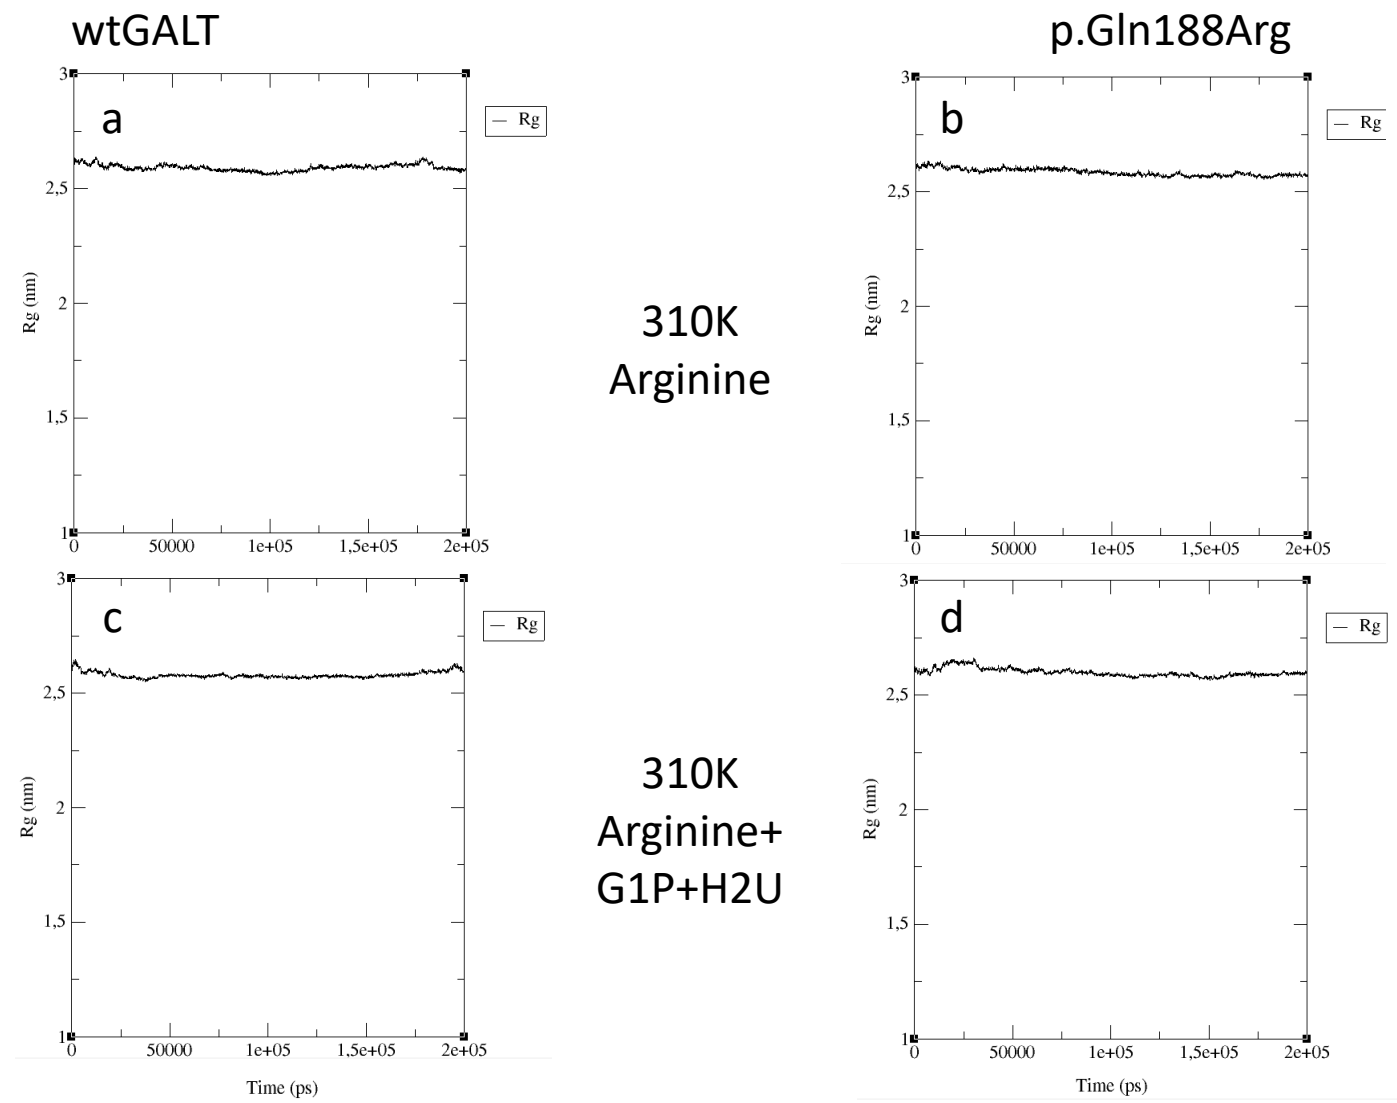

a): wtGALT+arginine; b): p.Gln188Arg+arginine; c) wtGALT+G1P+H2U+arginine; d) p.Gln188Arg+G1P+H2U+arginine.

# Figure S12

## SASA

### simulations with arginine in the central cavity

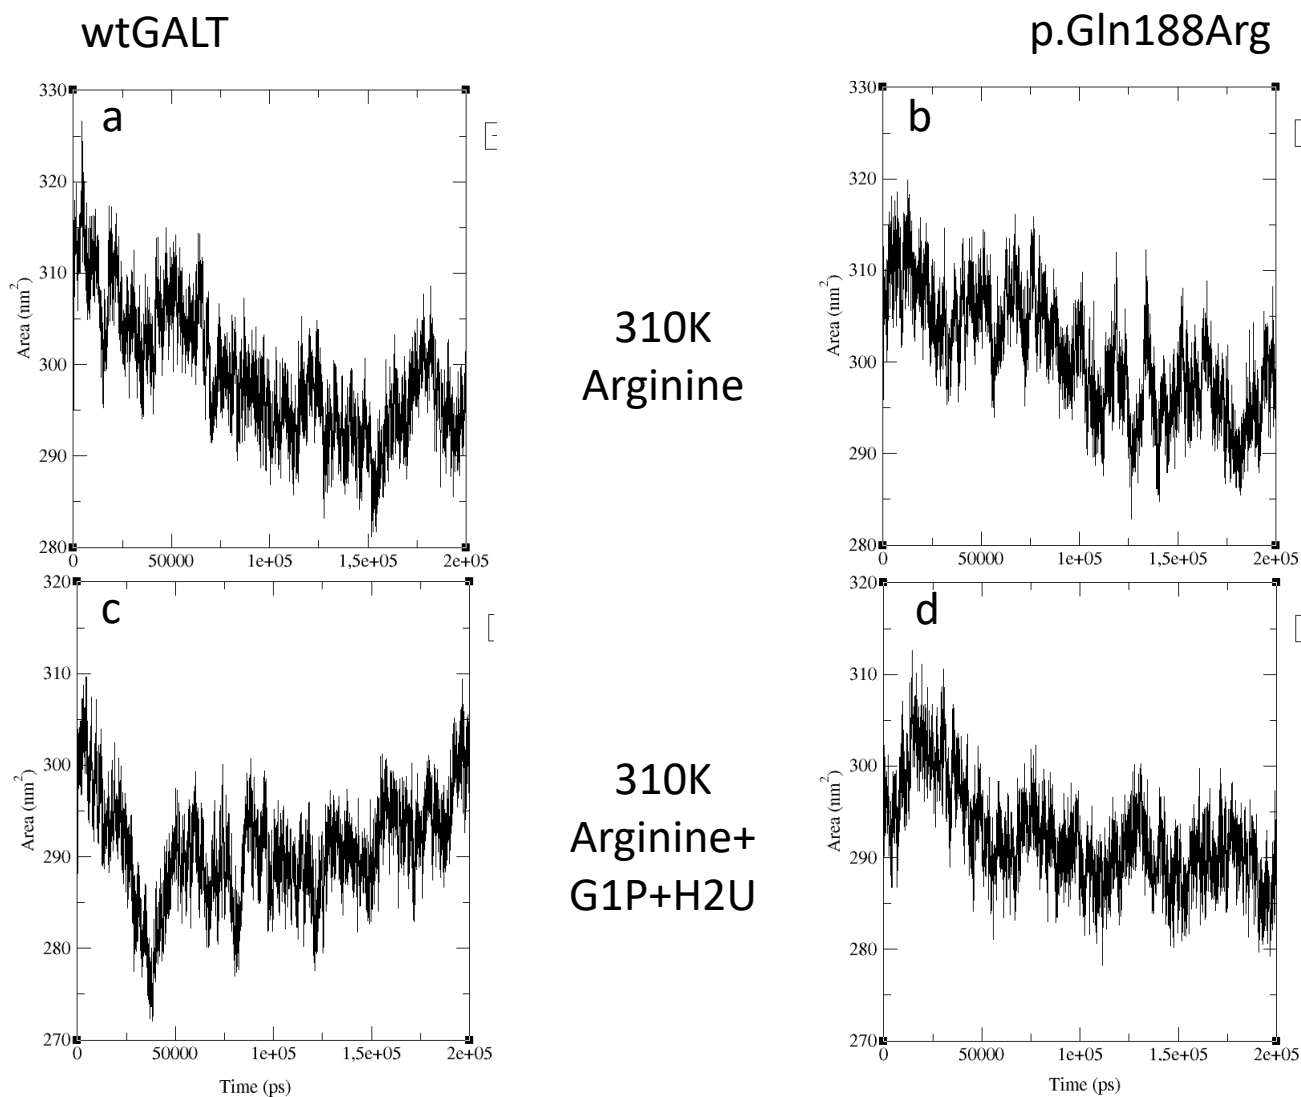

a): wtGALT+arginine; b): p.Gln188Arg+arginine; c) wtGALT+G1P+H2U+arginine; d) p.Gln188Arg+G1P+H2U+arginine.
