# Supplementary material for: Simulation of the Interactions of Arginine with Wild-Type GALT Enzyme and the Classic Galactosemia-Related Mutant p.Q188R by a Computational Approach
Source: Molecules. 2021 Oct 7;26(19):6061. doi: 10.3390/molecules26196061 (PMC8513022; doi:10.3390/molecules26196061)
Supplement: Supplementary file 1 [file molecules-26-06061-s001.zip › supplFiles-siArg_sito+cavita-rev.pdf]

# Supplementary File 1

## Quality check for wtGALT + Arg (active site)

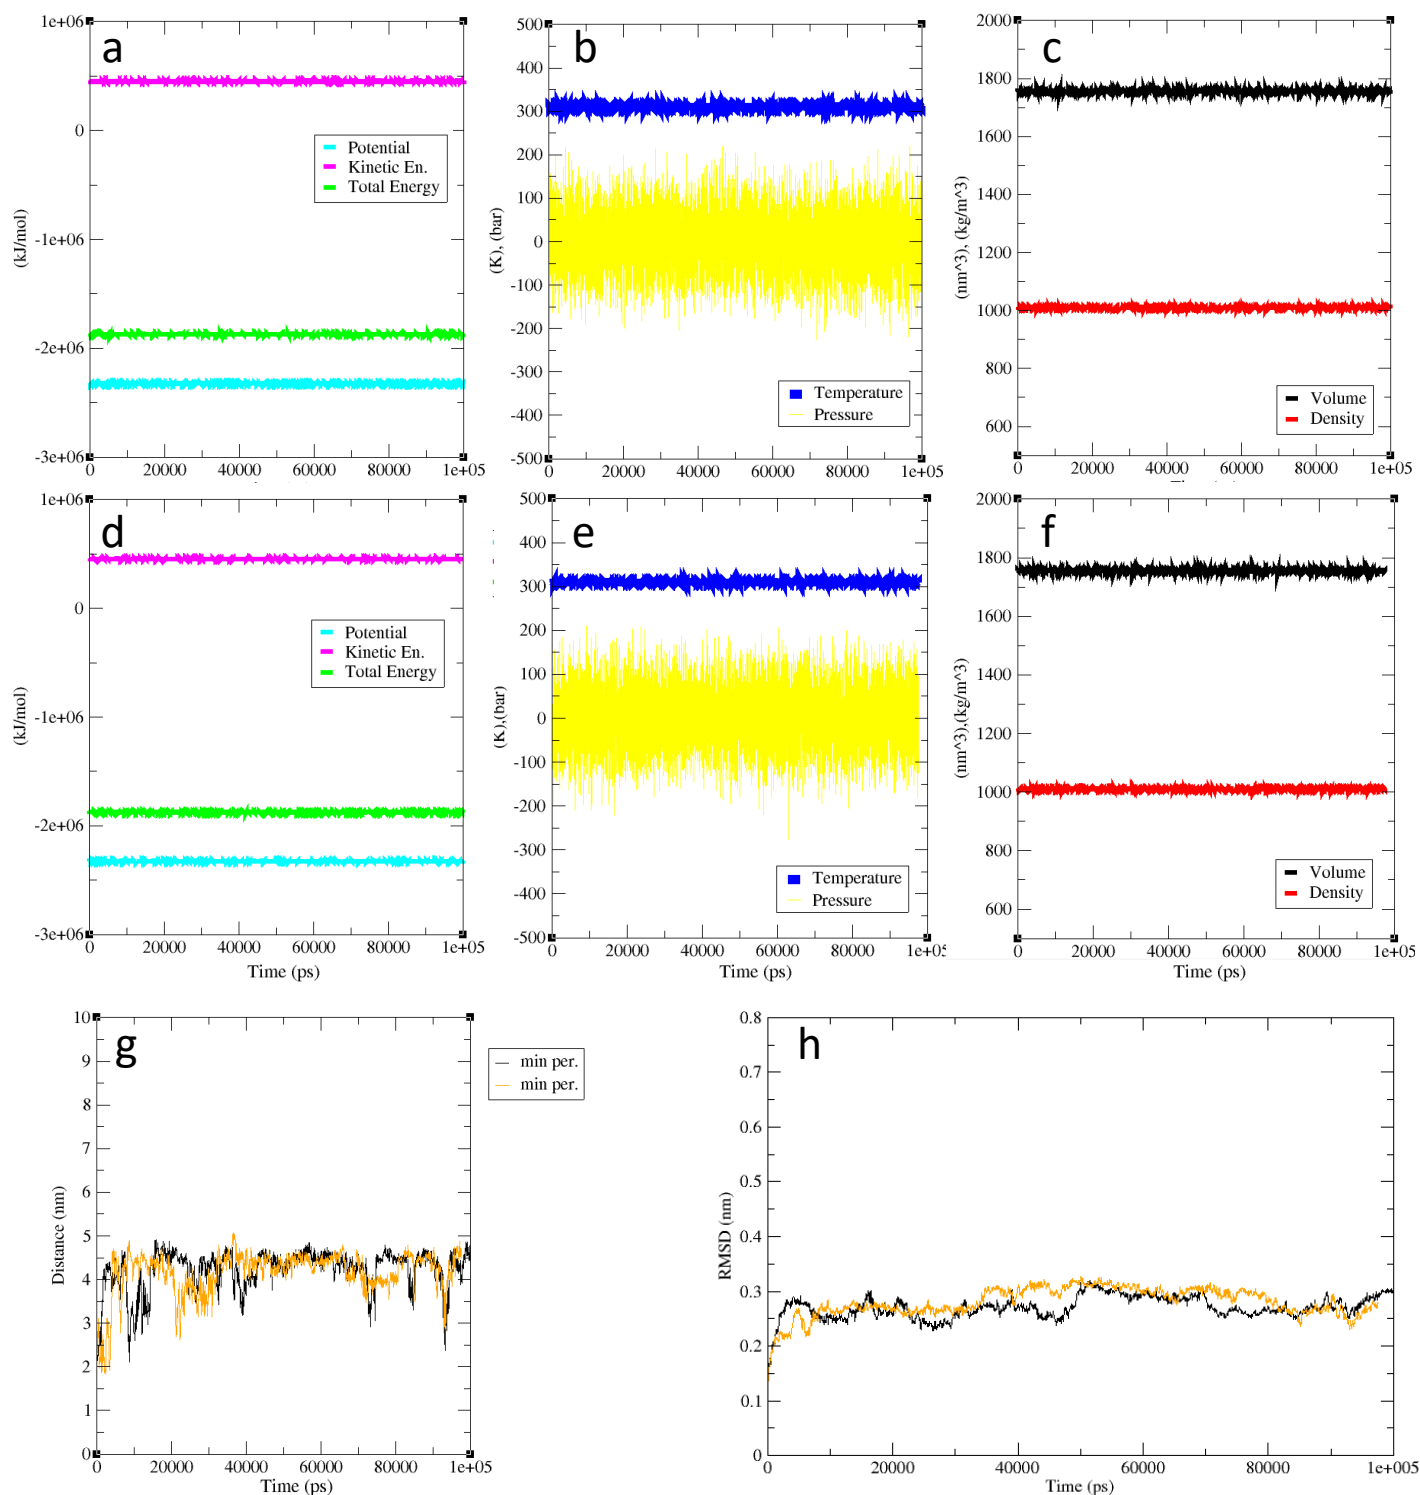

Legend: a: evolution of potential, kinetic and total energy of the first simulation; b: evolution of temperature and pressure of the first simulation; c: evolution of volume and density of the first simulation; d: evolution of potential, kinetic and total energy of the replica; e: evolution of temperature and pressure of the replica; f: evolution of volume and density of the replica; g: variation of minimum distance between periodic images of the two simulations; h: root mean square deviation (RMSD) of atom distances of the two simulations. Black line: first simulation; orange line: replica.

## Supplementary File 2

### Quality check for wtGALT + G1P + Arg (active site)

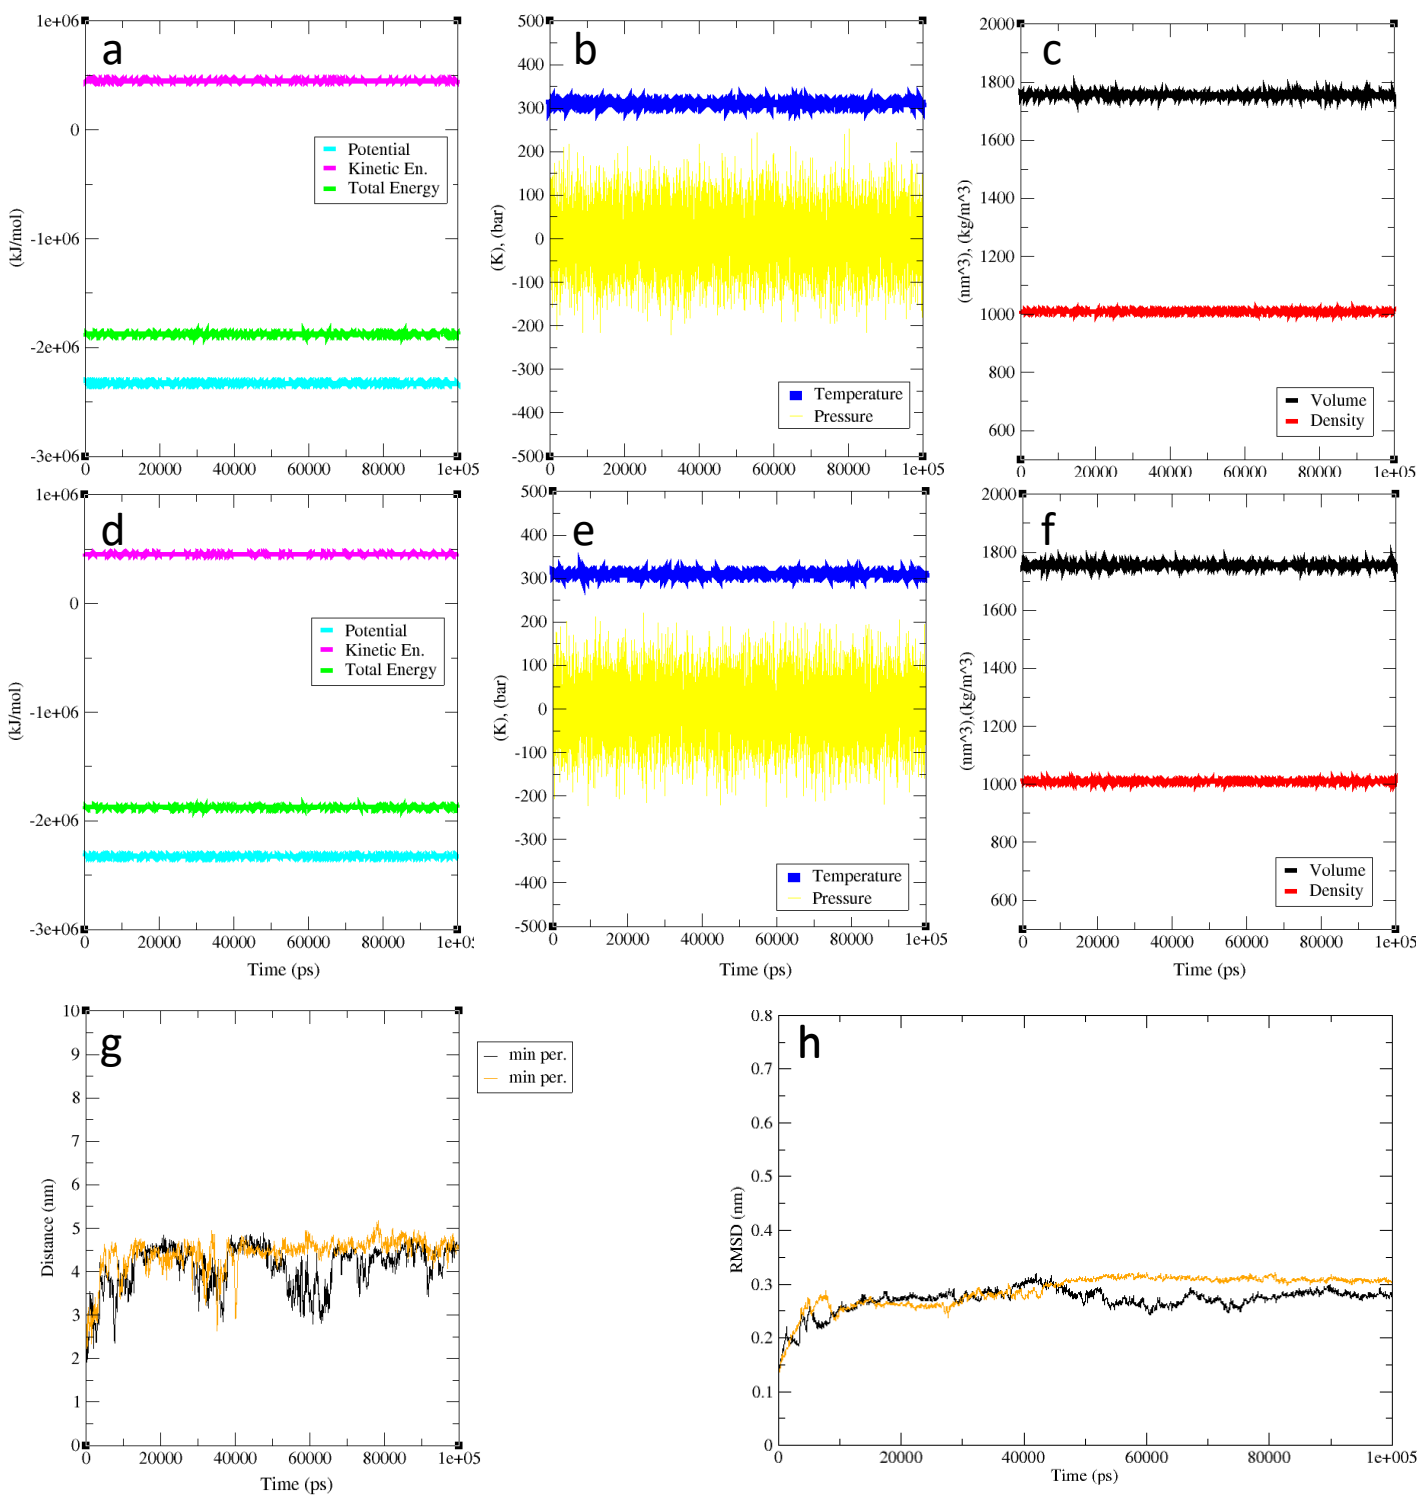

Legend: a: evolution of potential, kinetic and total energy of the first simulation; b: evolution of temperature and pressure of the first simulation; c: evolution of volume and density of the first simulation; d: evolution of potential, kinetic and total energy of the replica; e: evolution of temperature and pressure of the replica; f: evolution of volume and density of the replica; g: variation of minimum distance between periodic images of the two simulations; h: root mean square deviation (RMSD) of atom distances of the two simulations. Black line: first simulation; orange line: replica.

# Supplementary File 3

## Quality check for wtGALT + H2O + Arg (active site)

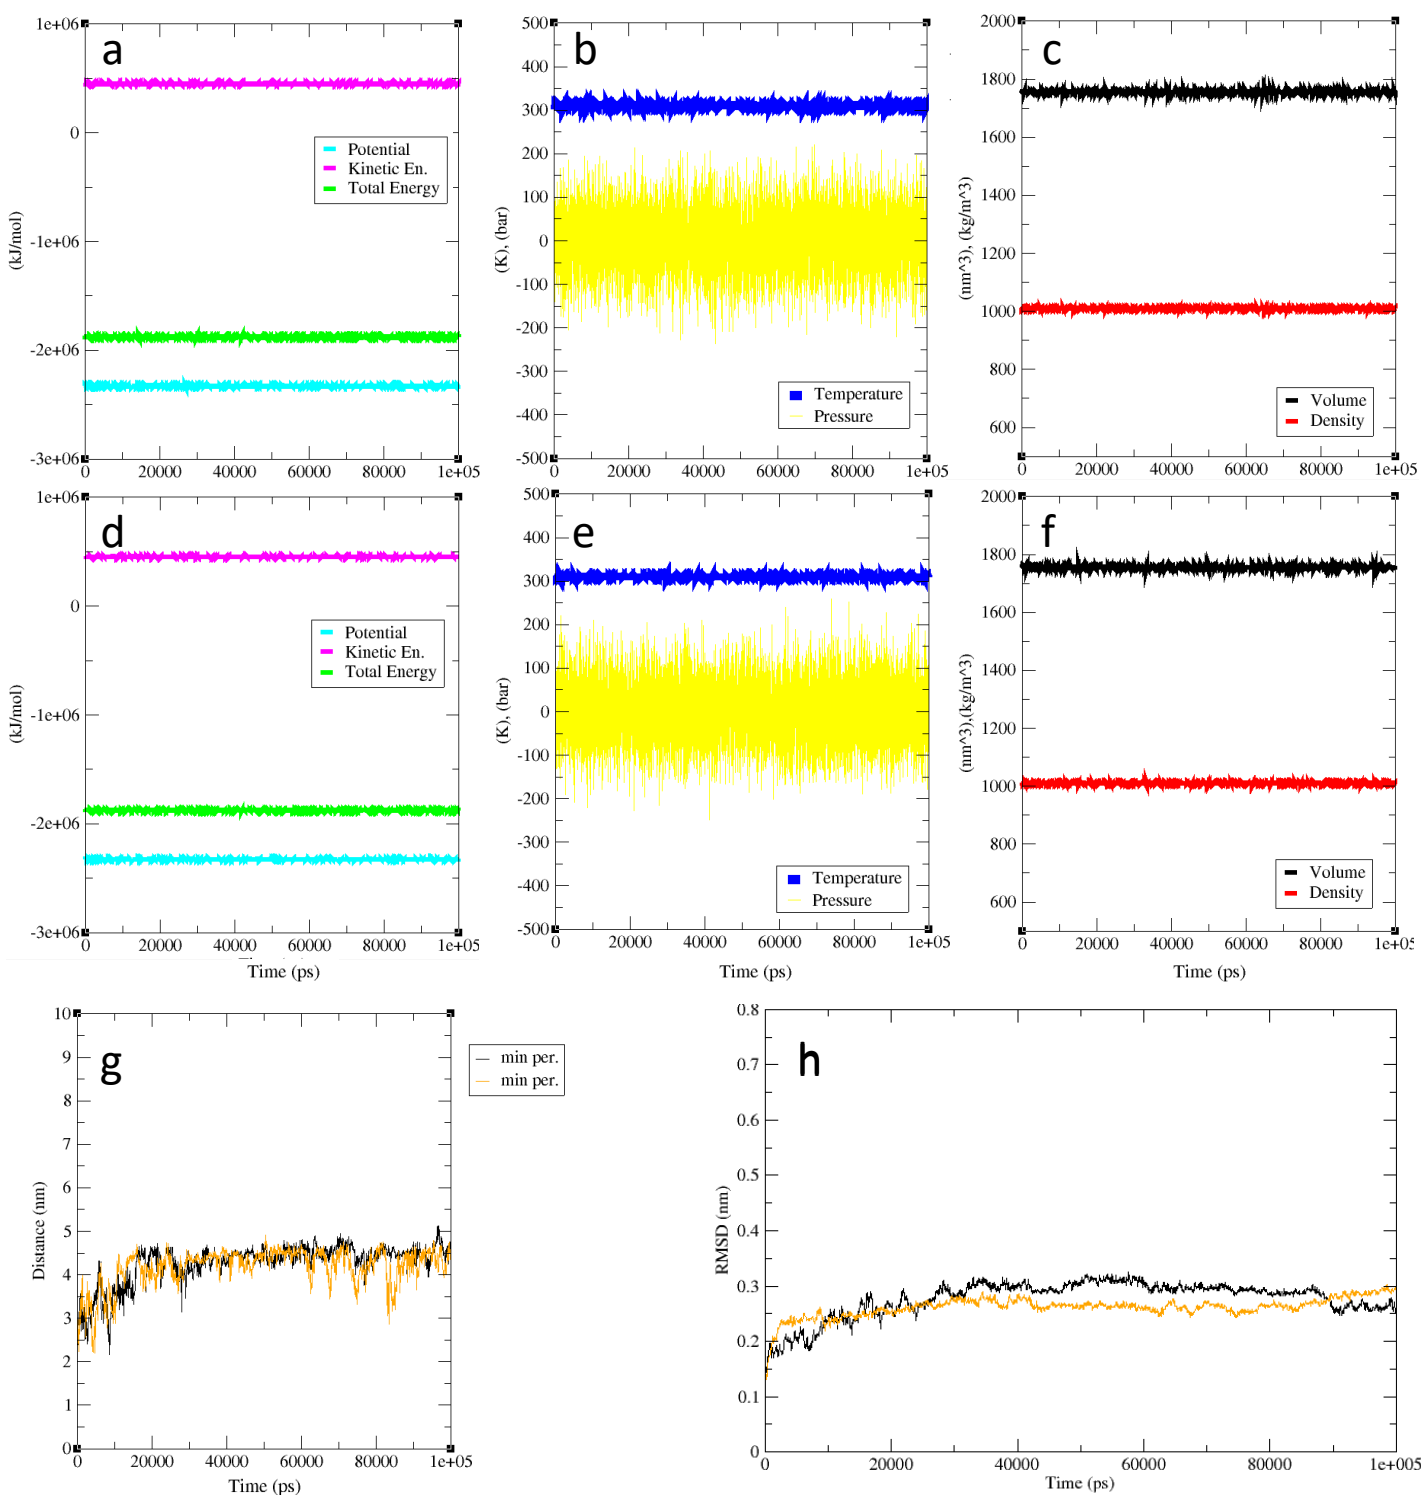

Legend: a: evolution of potential, kinetic and total energy of the first simulation; b: evolution of temperature and pressure of the first simulation; c: evolution of volume and density of the first simulation; d: evolution of potential, kinetic and total energy of the replica; e: evolution of temperature and pressure of the replica; f: evolution of volume and density of the replica; g: variation of minimum distance between periodic images of the two simulations; h: root mean square deviation (RMSD) of atom distances of the two simulations. Black line: first simulation; orange line: replica.

# Supplementary File 4

## Quality check for p.Gln188Arg + Arg (active site)

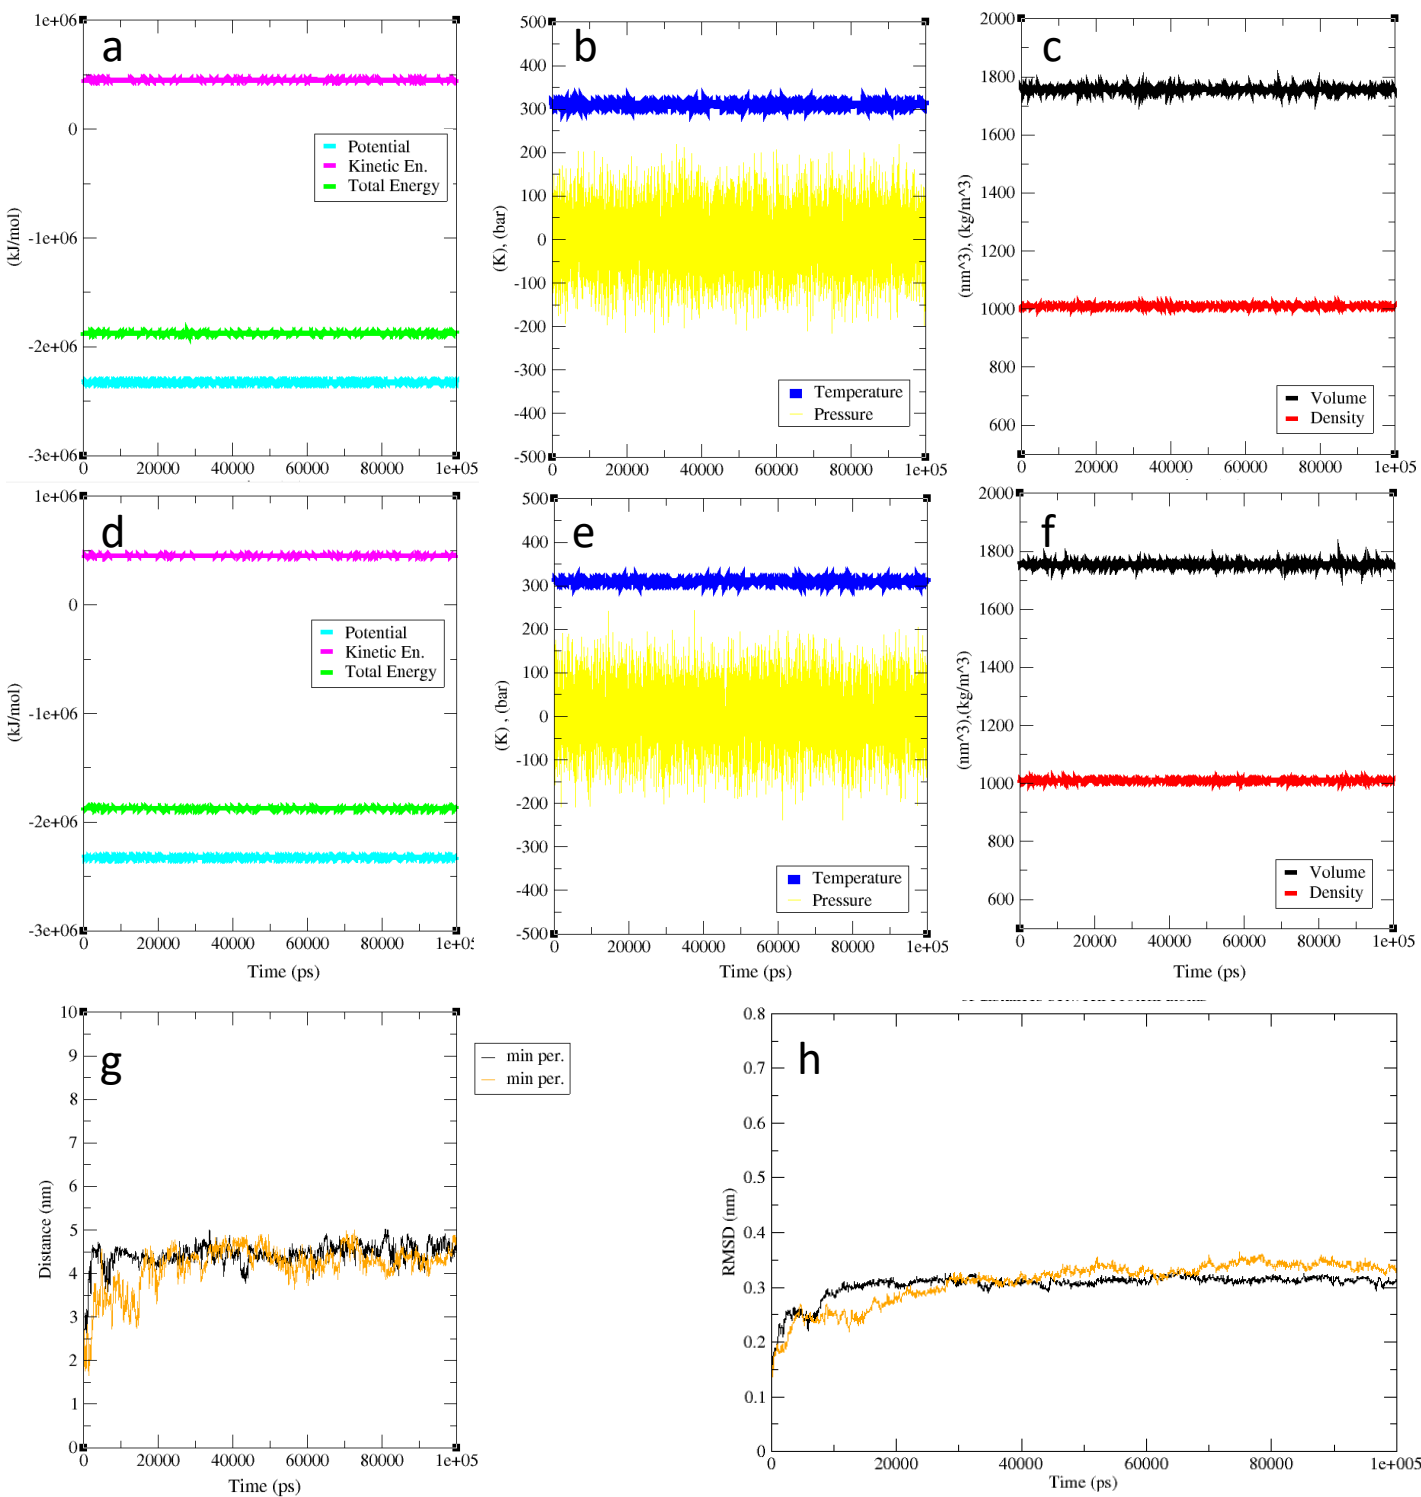

Legend: a: evolution of potential, kinetic and total energy of the first simulation; b: evolution of temperature and pressure of the first simulation; c: evolution of volume and density of the first simulation; d: evolution of potential, kinetic and total energy of the replica; e: evolution of temperature and pressure of the replica; f: evolution of volume and density of the replica; g: variation of minimum distance between periodic images of the two simulations; h: root mean square deviation (RMSD) of atom distances of the two simulations. Black line: first simulation; orange line: replica.

# Supplementary File 5

## Quality check for p.Gln188Arg + G1P + Arg (active site)

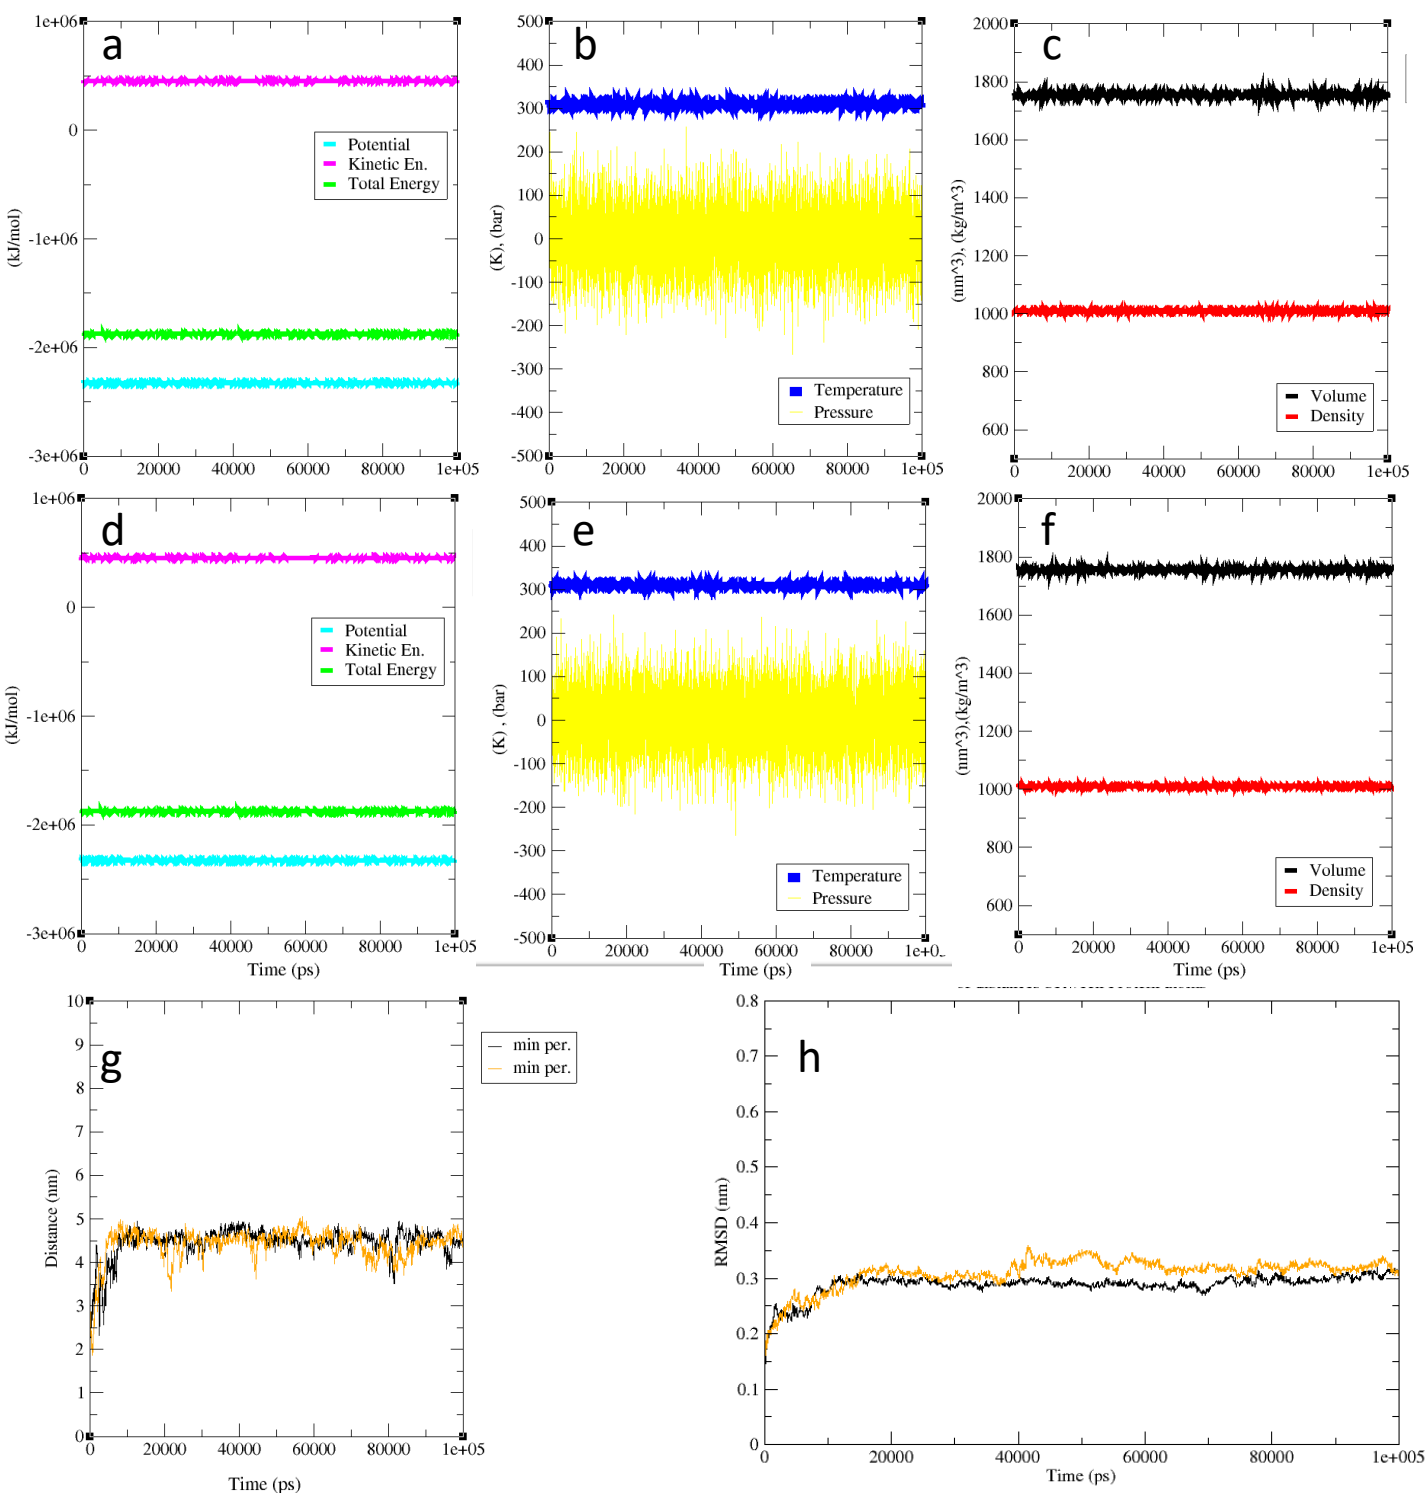

Legend: a: evolution of potential, kinetic and total energy of the first simulation; b: evolution of temperature and pressure of the first simulation; c: evolution of volume and density of the first simulation; d: evolution of potential, kinetic and total energy of the replica; e: evolution of temperature and pressure of the replica; f: evolution of volume and density of the replica; g: variation of minimum distance between periodic images of the two simulations; h: root mean square deviation (RMSD) of atom distances of the two simulations. Black line: first simulation; orange line: replica.

## Supplementary File 6

### Quality check for p.Gln188Arg + H<sub>2</sub>O + Arg (active site)

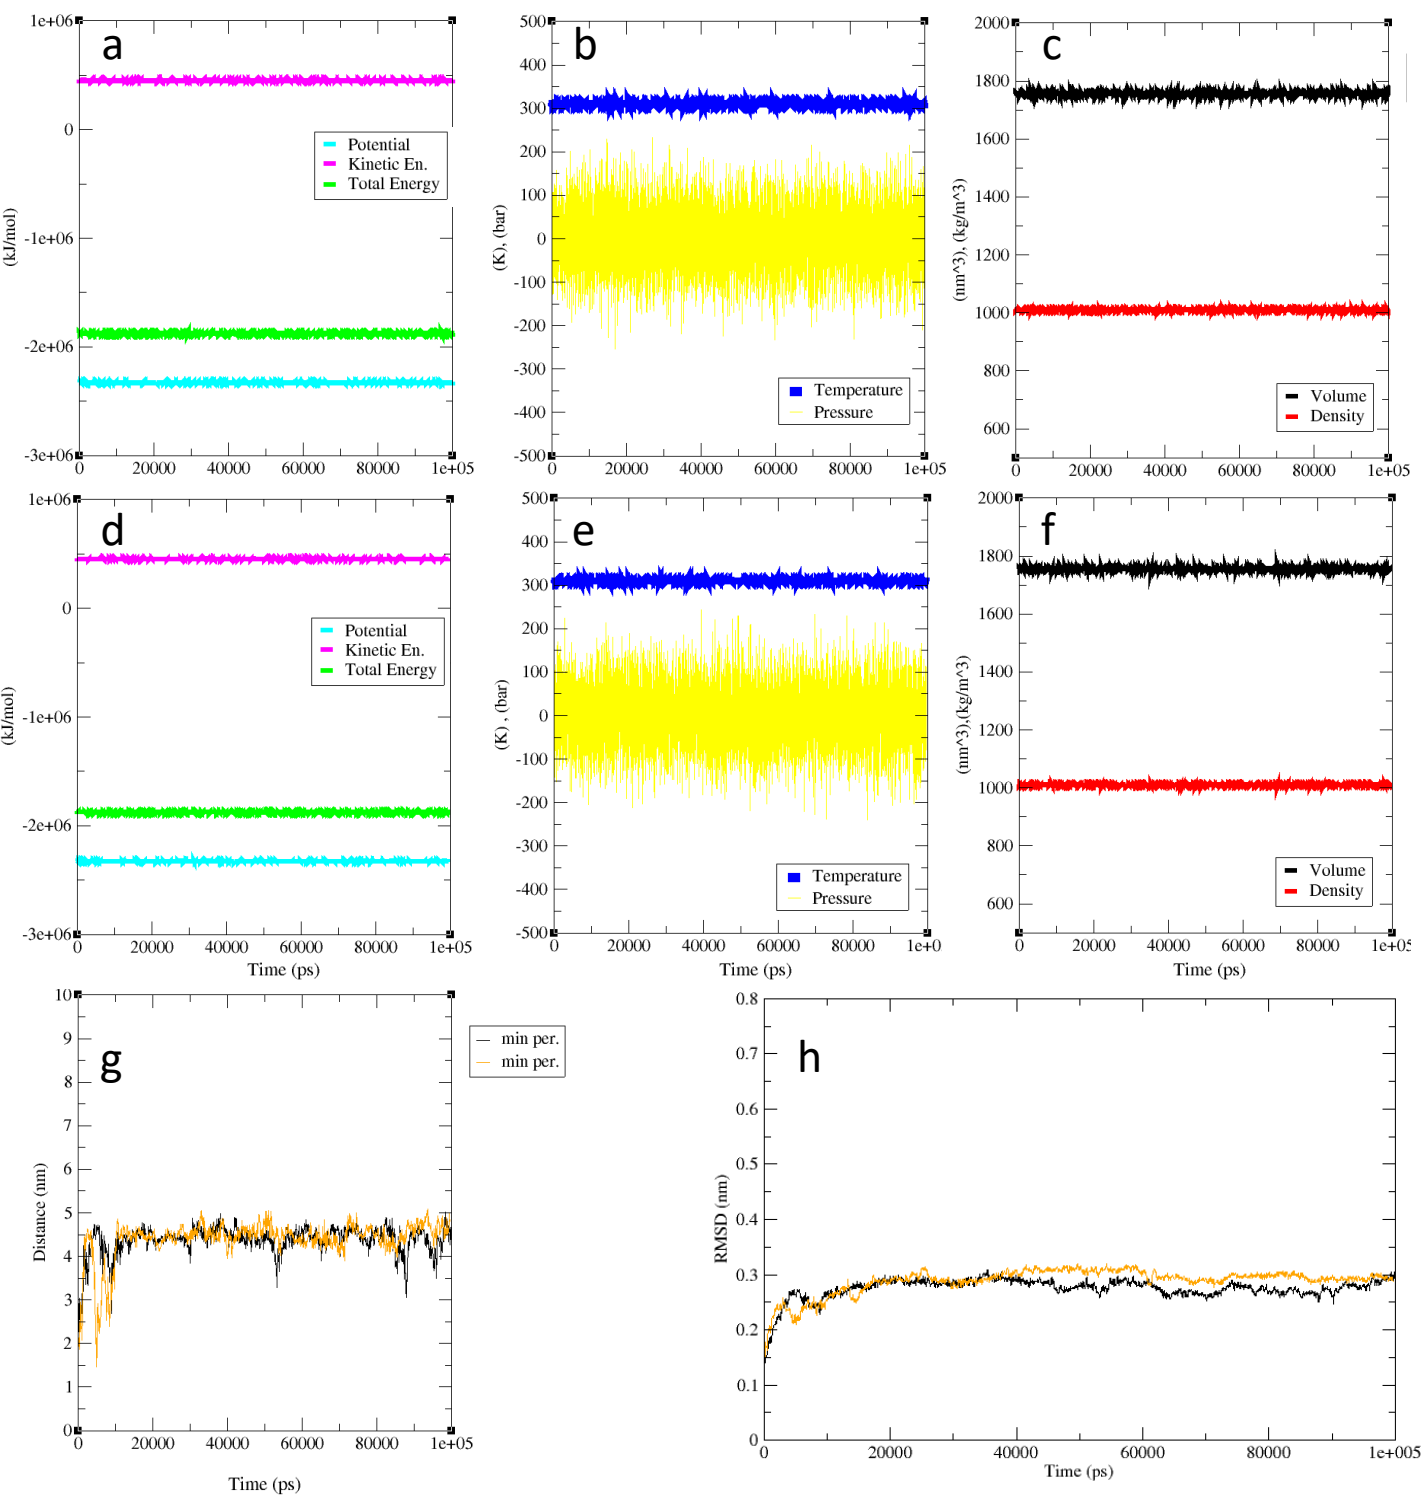

Legend: a: evolution of potential, kinetic and total energy of the first simulation; b: evolution of temperature and pressure of the first simulation; c: evolution of volume and density of the first simulation; d: evolution of potential, kinetic and total energy of the replica; e: evolution of temperature and pressure of the replica; f: evolution of volume and density of the replica; g: variation of minimum distance between periodic images of the two simulations; h: root mean square deviation (RMSD) of atom distances of the two simulations. Black line: first simulation; orange line: replica.

# Supplementary File 7

## Quality check for wtGALT + Arg (central cavity)

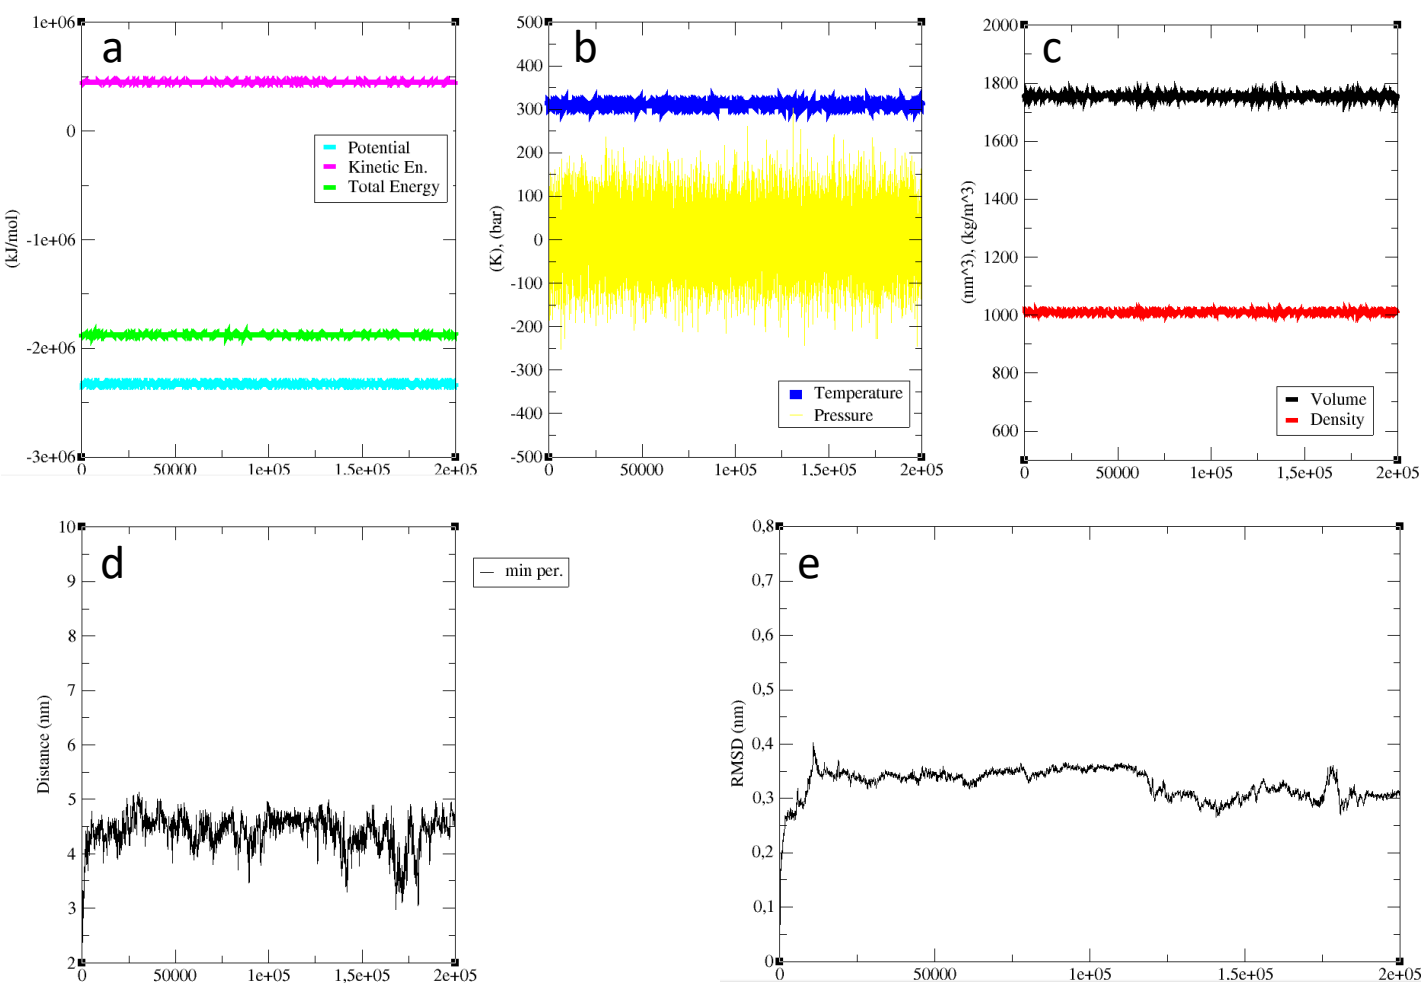

Legend: a: evolution of potential, kinetic and total energy; b: evolution of temperature and pressure; c: evolution of volume and density; d: variation of minimum distance between periodic images; e: root mean square deviation (RMSD) of atom distances.

# Supplementary File 8

## Quality check for wtGALT + ligands + Arg (central cavity)

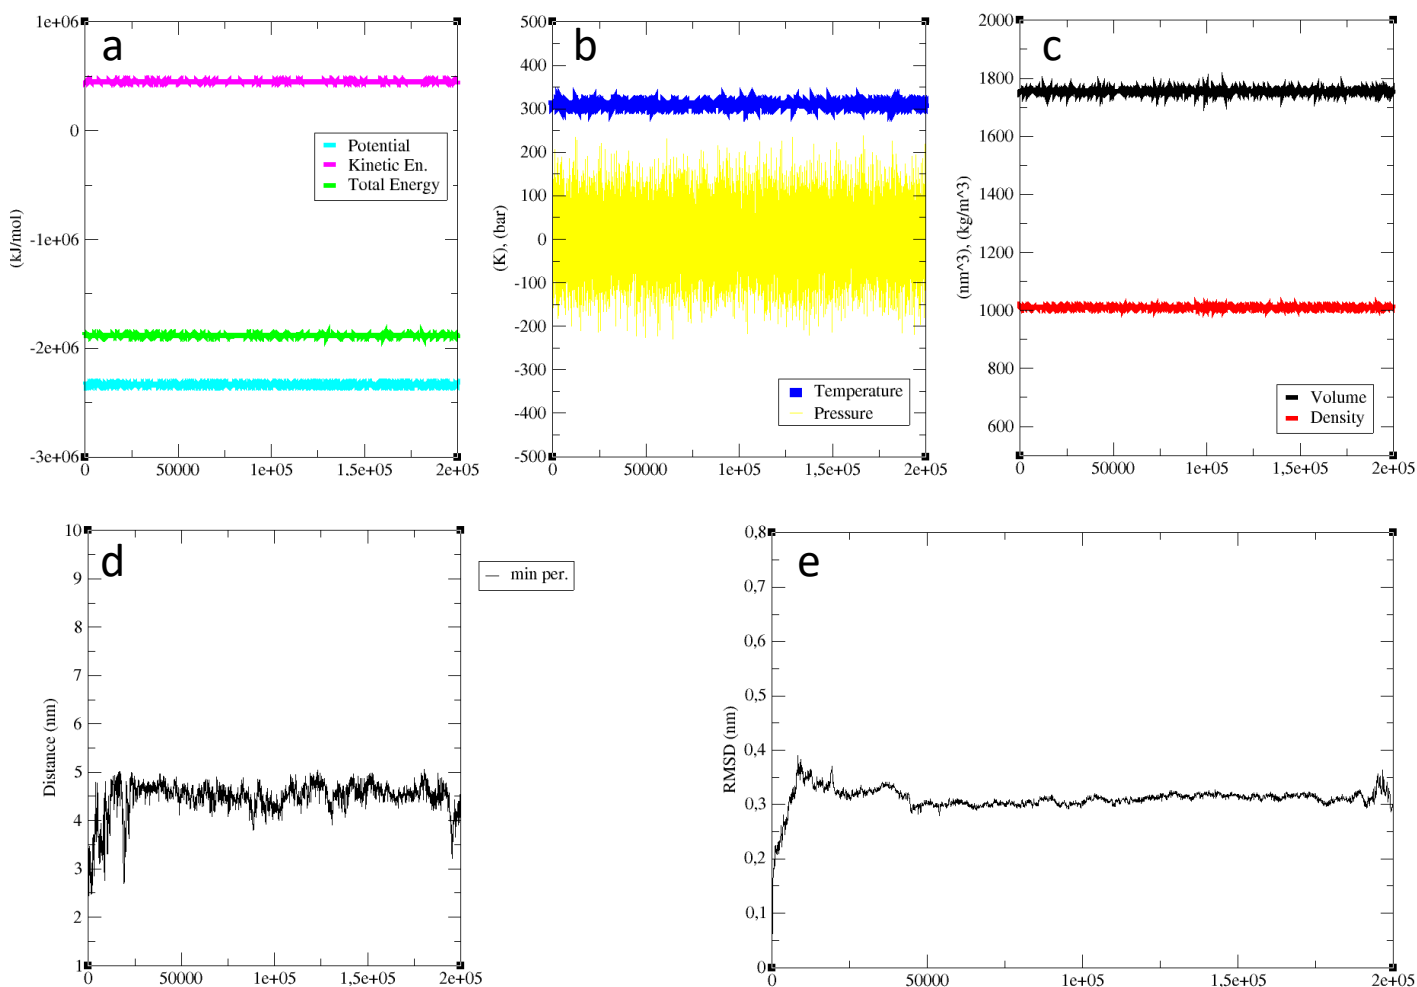

Legend: a: evolution of potential, kinetic and total energy; b: evolution of temperature and pressure; c: evolution of volume and density; d: variation of minimum distance between periodic images; e: root mean square deviation (RMSD) of atom distances.

# Supplementary File 9

## Quality check for p.Gln188Arg + Arg (central cavity)

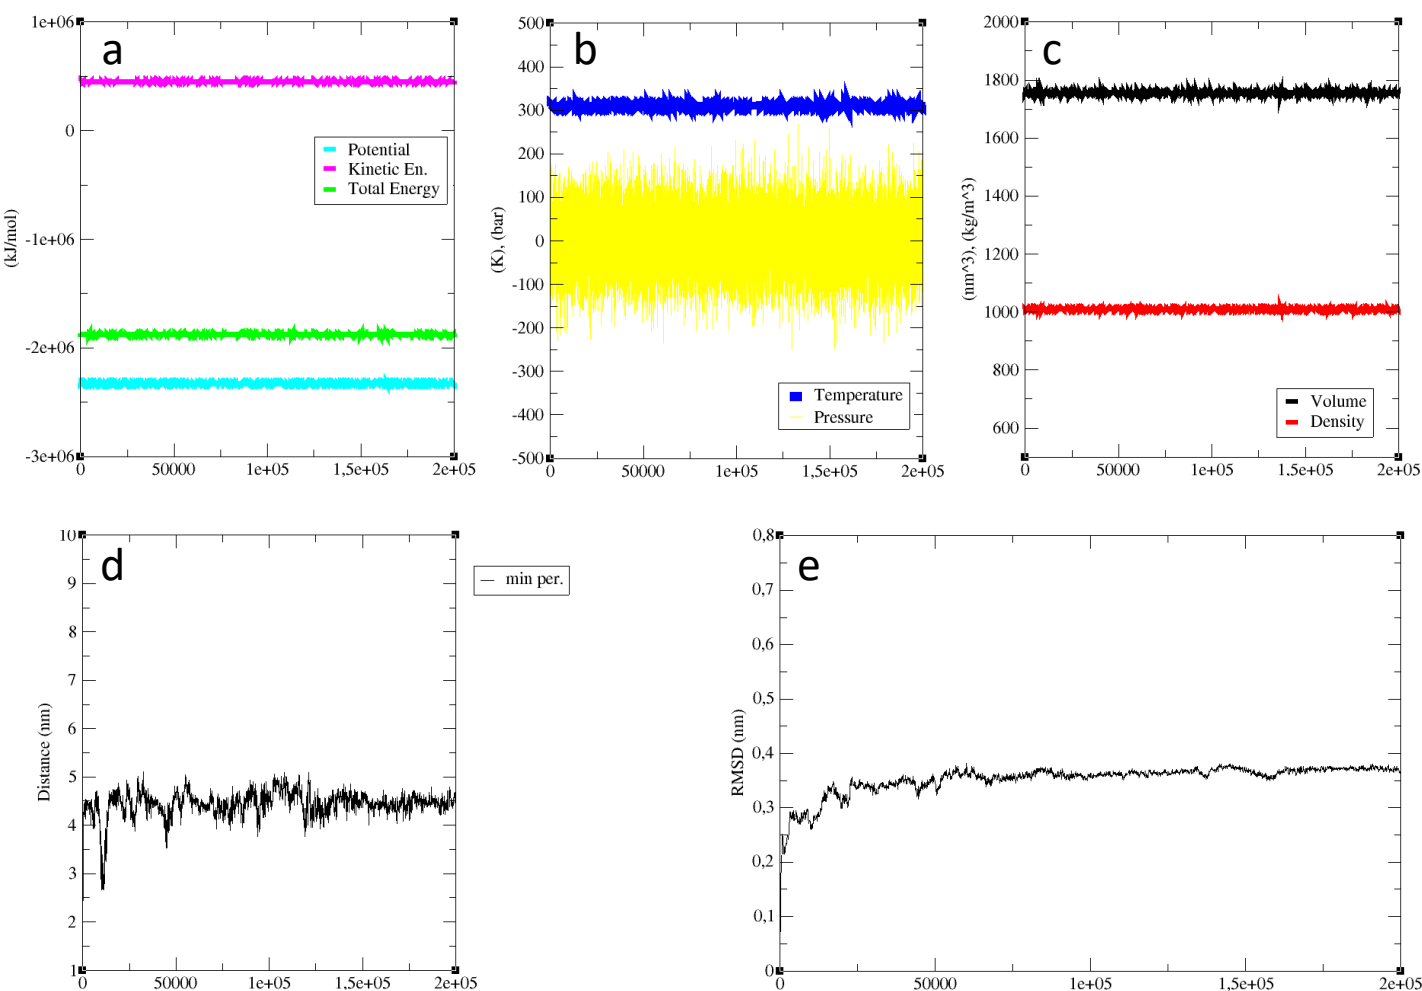

Legend: a: evolution of potential, kinetic and total energy; b: evolution of temperature and pressure; c: evolution of volume and density; d: variation of minimum distance between periodic images; e: root mean square deviation (RMSD) of atom distances.

## Supplementary File 10

### Quality check for p.Gln188Arg + ligands + Arg (central cavity)

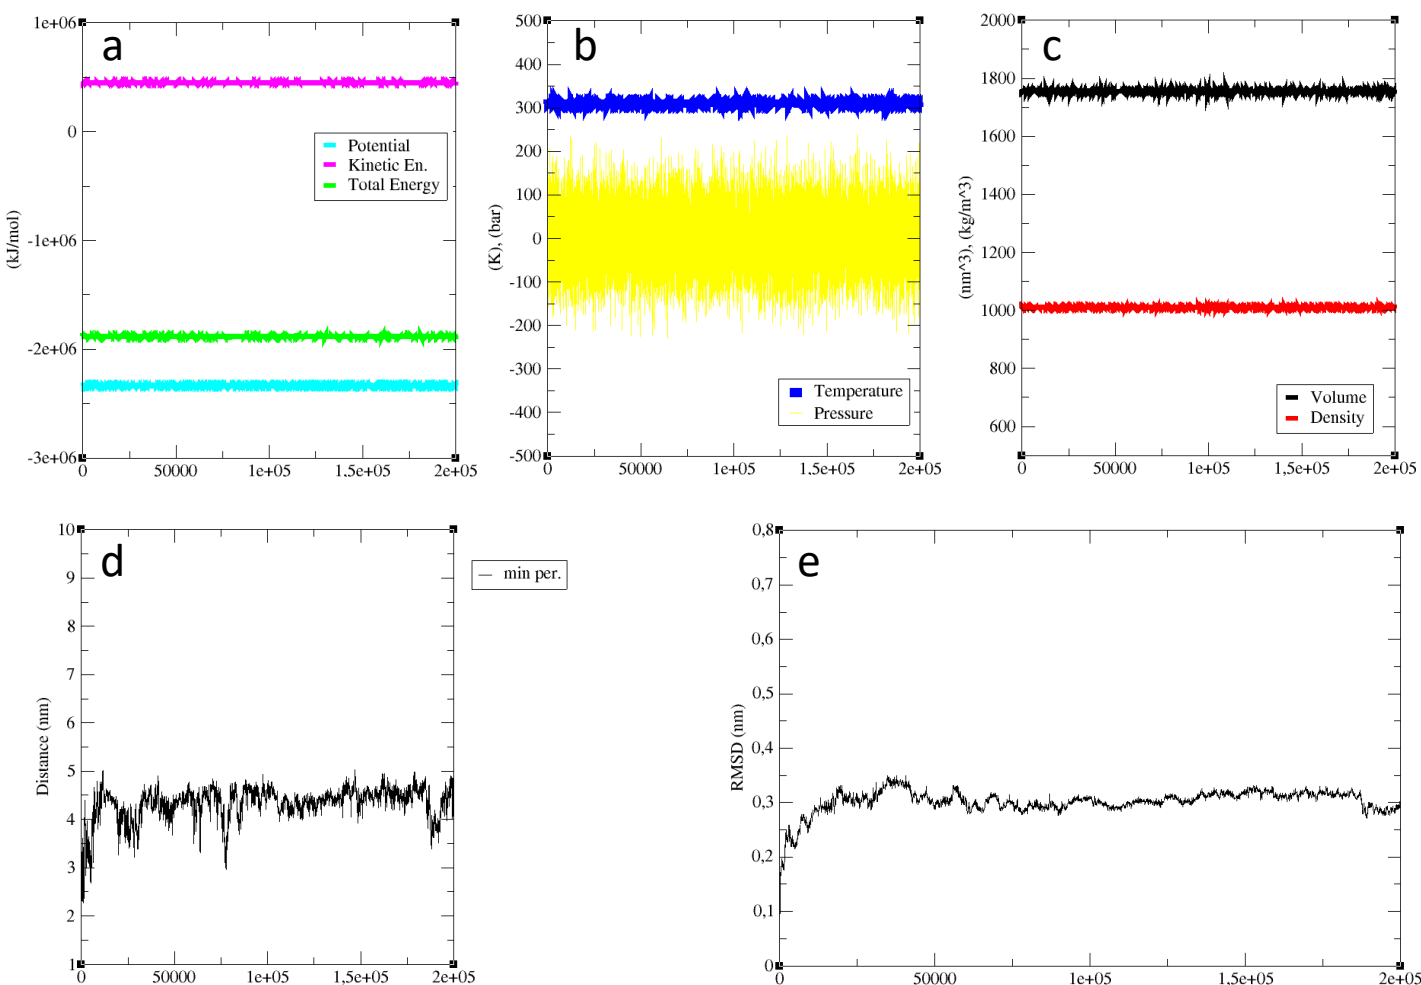

Legend: a: evolution of potential, kinetic and total energy; b: evolution of temperature and pressure; c: evolution of volume and density; d: variation of minimum distance between periodic images; e: root mean square deviation (RMSD) of atom distances.
